# Supplementary material
Source: PubMed Central journal article supplement (PMC2703779)
Supplement: NIHMS27162-supplement-Supplementary_data_1.pdf [file NIHMS27162-supplement-Supplementary_data_1.pdf]

## SUPPLEMENTARY RESULTS

### **UBD, MAS1L and ITPR3**

No evidence was found for association of the recently reported *ITPR3* SNP, rs2296336 (ref<sup>23</sup>) in a primary way ( $P = 0.91$  in 4,161 cases and 3,485 controls and  $P = 0.27$  in the families), nor after conditioning on *HLA-DRB1/HLA-DQB1* ( $P = 0.39$  in the 1,912 cases and 1,788 controls,  $P = 0.96$  in the families). Recently, the SNPs, rs3131020, rs1233478 and rs389419 located in the UBD and MAS1L gene regions at 29.5 - 29.6 Mb of chromosome 6 have been reported to be associated with T1D<sup>24</sup>. However, in our dataset of 2,369 cases and 1,938 controls, despite these three SNPs being strongly associated prior to conditioning ( $P = 2.88 \times 10^{-11}$ ,  $1.14 \times 10^{-17}$ ,  $2.57 \times 10^{-21}$ ), neither rs3131020 nor rs1233478 show evidence of association after conditioning on *HLA-DRB1/HLA-DQB1* ( $P = 0.38$ ,  $0.62$ ). For, rs389419, after conditioning,  $P = 0.00091$ : when the effects of the *HLA-B* alleles were accounted for,  $P = 0.00012$ . However, when the effects of *HLA-DRB1*, *HLA-DQB1*, and *HLA-A* were accounted for in the model, rs389419 was not associated with T1D,  $P = 0.82$ . Examination of the LD between the alleles of *HLA-A* and rs389419, shows that  $D' > 0.8$  for most alleles, except HLA-A\*33 and HLA-A\*68, indicating that UBD and rs389419 is not a primary effect.

### **Grouping of *HLA-DRB1* and *HLA-DQB1* alleles and genotypes**

The large number of *HLA-DQB1* and *HLA-DRB1* alleles results in sparse data, as a number of very rare alleles and/or genotypes, exist exclusively in affected or in unaffected individuals but not both, or only exist in small numbers of affected and unaffected subjects, so the risks are inaccurately modelled. The number of parameters to use to model the effects of the MHC class II loci should also be considered: too many causes a loss of power and poor asymptotic properties of the test statistic, while too few causes residual confounding. A common approach is to group alleles and/or genotypes together by frequency, risk or function. These groupings imply assumptions, which are almost certainly not valid, e.g. that alleles/genotypes confer similar risks if they are rare. Alternatively, rare alleles may be dropped from the analysis. One can also group by function, but the full function of all the different alleles is not yet clear, so this becomes somewhat arbitrary.

Three grouping strategies were considered for the class II loci in order to account for their confounding effects while testing for additional independent T1D loci. One was based on the frequency of the genotypes. Two frequency thresholds were tested, 1% and 5%, such that all genotypes below that frequency threshold were grouped together. The second approach used haplotype risk estimates published by Koeleman *et al.*<sup>33</sup> to categorize class II genotypes into high, neutral and low risk groups. The third approach was based on the *HLA-DRB1* genotype. Non-DR3/DR4 alleles were grouped together (including *HLA-DRB1*\*0403 which was protective in our dataset).

Fifteen loci, including the *TAP2* SNP rs241448, were used to test these grouping strategies. We found that the  $P$ -value for the test locus, conditional on the class II genotypes, was, at some loci, dependent on the method of grouping of the class II loci adopted e.g. the  $P$ -value for *HLA-B* association varied by nine orders of magnitude between the model grouping genotypes below 0.05 compared to that grouping at 0.01 ( $P = 6.20 \times 10^{-7}$  -  $2.14 \times 10^{-16}$ ; Supplementary Table 3). Similarly *D6S2444*, ranged from  $P = 1 \times 10^{-4}$  to  $7 \times 10^{-12}$  for the risk-based and frequency-based methods.

## SUPPLEMENTARY DISCUSSION

### Consistency of the *HLA-A* association

We obtain inconsistent results for *HLA-A* between the case-control set and the families. We do not think this can be attributed to the modelling of the MHC class II effects. Although we do not use the matching of the cases and pseudo-controls when constructing trees in the families, this matching is reintroduced when considering additional loci, so we believe the impact of this is minimal. The major effects at non-class II loci are robust to the model chosen, once a threshold number of groups are reached (Supplementary Table 3). Further, bootstrap analysis showed the tree model generated for the HLA-DQB1/HLA-DRB1 genes was robust (Methods). More likely causes of the discrepancy in *HLA-A* association are ascertainment<sup>31,32</sup>, or possible population heterogeneity as the families came from both the UK and USA whereas the cases and controls are British. Hence, the samples will have slightly different genetic backgrounds and different allele frequencies (Supplementary Tables 1; for example the frequency of the highly predisposing DR3/4 genotype in the UK cases is 36% compared to 43% in the ASPs). Additionally, *HLA-A* may have a smaller effect in the ASP families than in cases and controls owing to an epistatic effect of the DR3/4 genotype, for instance. We have reported previously<sup>31</sup> that non-class II gene risk estimates are generally lower in multiplex families than population-based case-control samples or simplex families, possibly owing to epistatic effects of the major MHC class II susceptibility alleles or genotypes. Similarly, a more recent study reported that if a common disease has a susceptibility locus with a large effect, smaller effects of other loci could be masked<sup>32</sup>. Hence, we think the most likely reason for the inconsistent results is power. We were under-powered to find effects of 1.5 in the families (*e.g.* 32% power to detect an effect at  $\alpha = 10^{-5}$ , for MAF = 0.1 assuming a multiplicative model, compared to 53% power in the larger case-control set). So if the effect was of this magnitude in the families, we may not have found it. We did adjust for geographical regions across Great Britain in the case-control analyses<sup>17,30</sup>, ruling out the possibility that the large, independent association of the HLA-A gene in the case-control samples could be a false-positive result owing to population stratification and admixture. Moreover, the *HLA-A* allele frequencies do not vary across Great Britain ( $P = 0.52$ ), and since we have localised T1D susceptibility to *HLA-B*, it is not unexpected that alleles of the functionally-related HLA-A gene are also involved in T1D.

## SUPPLEMENTARY METHODS

### Genotyping

Genotyping of the HLA-DQB1, HLA-DRB1, HLA-A, HLA-B and HLA-C genes was done using Dynal RELI SSO assays (Invitrogen Ltd, Paisley, UK). When resolution of the HLA-DRB1\*04 subtypes was not sufficient we re-genotyped each sample using an appropriate Dynal AllSet SSP assay. Microsatellite markers were genotyped as described previously<sup>5,18</sup>. We genotyped *HLA-A*, *HLA-B* and *HLA-C* alleles to four-digit resolution according to the HLA gene nomenclature ([http://www.anthonynolan.org.uk/HIG/nomen/nomen\\_index.html](http://www.anthonynolan.org.uk/HIG/nomen/nomen_index.html)). A sequencing-based typing assay was designed (SF, SN, NMW, JMMH, JAT, manuscript in preparation) for the genotyping of the highly polymorphic MICA and MICB genes. Individual SNP genotyping in the families was done using Invader (Third Wave Technologies, Madison, WI) or TaqMan (Perkin Elmer Applied Biosystems, Foster City, CA). An additional, 169 MHC nsSNPs were genotyped as part of a genome-wide nsSNP scan using the GeneChip MegAllele System (Affymetrix, Santa Clara, CA)<sup>30</sup>.

As part of the WTCCC project, 2,126 SNPs, were typed between 25 Mb and 35 Mb on chromosome 6p21 with the GeneChip® 500K Mapping Array Set (Affymetrix chip)<sup>17</sup>. The eight

SNPs in the follow-up WTCCC dataset were genotyped by TaqMan (Perkin Elmer Applied Biosystems, Foster City, CA).

### Single locus analyses: UK and USA families

All loci conformed to Hardy-Weinberg equilibrium in the unaffected parents,  $P > 0.004$ . Single locus analyses were carried out by generating sets of cases with matched pseudo-controls (generated from genotypes that could have been transmitted but were not<sup>28</sup>), and testing for association with T1D in a logistic regression framework, conditioning on having at least one affected offspring in every set<sup>28</sup>. Two-digit allele coding, grouping the four-digit subtypes into a two-digit type, were used for the HLA-A, HLA-B and HLA-C genes as this reduced the multiplicity of alleles, hence simplifying the statistical models. However, subtypes of HLA-B\*39 have two equally frequent splits (Supplementary Tables 1 and 4) and so were analysed separately. Non-independence of siblings in the ASP families was accounted for by using robust Huber-White sandwich estimators. However, at loci with sparse data, the Wald test is artificially biased towards the alternative, hence no adjustment could be made. Both allelic (alleles coded as continuous variables assuming a multiplicative model, on  $n - 1$  degrees of freedom where  $n$  = the number of alleles) and genotype models (which do not assume a specific mode of inheritance on  $n - 1$  degrees of freedom where  $n$  = the number of genotypes) were tested and where they were not significantly different,  $P > 0.05$ , the multiplicative was used. Where necessary, to ensure all parameters in the model were estimable, rare genotypes were grouped together at either 0.05 (five loci) or 0.01 (three loci) minimum frequency, or alleles below 0.005 frequency were grouped (eight loci).

No formal correction for multiple testing was made. However, when considering rejection of the null, we set a threshold of  $P < 0.0001$ .

### Single locus analyses: British cases and controls (non-WTCCC)

All loci conformed to Hardy-Weinberg equilibrium in the controls ( $P > 0.003$ ). Cases were matched to controls, according to 12 broad geographical regions<sup>17,30,34</sup>, and analysed within strata by logistic regression. Both genotype and allele models were considered at all loci. The genotypes at, *HLA-DRB1*, *-DQB1* and *-B*, were grouped by frequency at the 0.05 level.

### Single locus analyses: WTCCC British cases and controls

All loci conformed to Hardy-Weinberg equilibrium in controls at the level set for the entire WTCCC study ( $P < 5 \times 10^{-7}$ ). Call rate for all SNPs had to be greater than 99%, and minor allele frequency greater than 0.05 in order to be analysed for association with T1D. In total 651 SNPs of the total 2,126 SNPs between 25 Mb and 35 Mb, did not satisfy these criteria and so were excluded from analysis. Cases were matched to controls, according to 12 broad geographical regions<sup>17,30,34</sup>, and analysed within strata by logistic regression. Allele models were used for all SNPs.

### Power calculations

Our study was extremely well powered to find the effects of the HLA-DQB1 and HLA-DRB1 genes, although our main aim was to test whether any other loci in the MHC had an additional effect. For this hypothesis the power calculations were not straightforward, due to the complexity of the MHC region, with extensive LD and given that we were looking for an effect within the strata of the *HLA-DRB1/HLA-DQB1* model. Hence, simulated datasets were generated from sets of cases and pseudo-controls, which had been generated from the ASP families. The affection status was permuted within these sets and the resultant permuted datasets used to test, by conditional logistic regression, the effect of the third locus. Crucially, the grouping from the

recursive partitioning model was maintained. The effect size and variance of the third locus was used to calculate the Wald test to assess significance and subsequently the power of the study. A total of 100,000 replicates were performed. The case-control set was also used to perform power calculations, for the same reasons given above. For a putative causal locus with a minor allele frequency of interest *e.g.* 0.1, the standard error under the null hypothesis,  $S_0$ , with  $OR = 1$  was estimated, as was the standard error under the alternative hypothesis,  $S_1$ , corresponding to an OR of interest. These estimates were calculated using the groupings of *HLA-DRB1* and *HLA-DQB1* generated by the recursive partitioning method. The power was calculated as the probability that a normal deviate,  $Z_\alpha$ , with mean  $\log(OR)$  and standard error,  $S_1$ , exceeds  $(S_0 \times Z_\alpha)$ .

Assuming a multiplicative model and a MAF of 0.1, we had 98% power to detect a relative risk of 2.0 at  $\alpha = 10^{-5}$  in the 850 ASP families. The power dropped to 60% for a minor allele frequency MAF of 0.05. For an effect of 1.5 we had 32% power at MAF of 0.1. In contrast, in the case-control collection we had 99.9% power to detect an  $OR=2.0$  for an allele with  $MAF=0.1$ , at  $\alpha = 10^{-5}$  assuming a multiplicative model and for  $OR=1.5$ , 53% power. So, we had greater power in the cases and controls than in the families for smaller effect sizes, which reflects the difference in sample size between the case-control set and the families, with the case-control set being almost twice as large.

### Testing for age-at-diagnosis effects.

Specific HLA class I alleles were tested for modifying effects on age-at-diagnosis of T1D, separately in the isolated British cases, and the affected offspring from the multiplex families. Regression was used with genotype (or allele) of interest as the outcome variable and age-at-diagnosis as the independent variable. Geography, the twelve sub-regions of Great Britain<sup>17,30,34</sup>, was included as a confounder.

### Haplotypes

Often *HLA-DRB1*, *HLA-DQA1* and *HLA-DQB1* are analysed as haplotypes as the LD between them is very strong. Pseudo-controls and cases were generated including phase as described by Cordell and Clayton<sup>28</sup>. Phased genotypes were generated using the haplo.stats library in R (<http://cran-r.project.org>) separately in cases and in controls. Here we found no evidence of cis-interactions, when haplotypes were included as splitting criteria in *rpart*, (they were not selected to partition the data) nor when phase information was added into the regression model ( $P > 0.05$ ). Consequently we only used genotypes of the MHC class II loci for the recursive partitioning model.

### Combining *P*-values

To generate a combined *P*-value for each of *HLA-B* and *HLA-A*, we carried out Wald tests in the case-control set and separately in the families. The estimates were weighted by the inverse variance and summed, and then divided by the sum of the weights to combine the effects.

## SUPPLEMENTARY TABLES

**Supplementary Table 1a | The number of families, cases and controls, from the first case-control set, typed at the classical loci (the second case-control set is not included).**

| Locus           | Number of families typed | Number of families typed at <i>HLA-DRB1</i> and <i>HLA-DQB1</i> | Number controls typed | Number of controls typed at <i>HLA-DRB1</i> and <i>HLA-DQB1</i> | Number of cases typed | Number of cases typed at <i>HLA-DRB1</i> and <i>HLA-DQB1</i> |
|-----------------|--------------------------|-----------------------------------------------------------------|-----------------------|-----------------------------------------------------------------|-----------------------|--------------------------------------------------------------|
| <i>HLA-DQB1</i> | 815                      | N/A                                                             | 1880                  | N/A                                                             | 2036                  | N/A                                                          |
| <i>HLA-DQA1</i> | 252                      | 246                                                             | 0                     | 0                                                               | 0                     | 0                                                            |
| <i>HLA-DRB1</i> | 809                      | N/A                                                             | 1894                  | N/A                                                             | 1954                  | N/A                                                          |
| <i>HLA-A</i>    | 655                      | 640                                                             | 1759                  | 1721                                                            | 1514                  | 1503                                                         |
| <i>HLA-B</i>    | 754                      | 736                                                             | 1673                  | 1642                                                            | 1512                  | 1498                                                         |
| <i>HLA-C</i>    | 668                      | 649                                                             | 0                     | 0                                                               | 0                     | 0                                                            |

Supplementary Table 1b | *HLA-DQB1* allele frequencies.

| <i>HLA-DQB1</i> allele | UK families, affected offspring, n (%) | UK families, unaffected parents, n (%) | USA families, affected offspring, n (%) | USA families, unaffected parents, n (%) | British cases, n (%) | British controls, n (%) |
|------------------------|----------------------------------------|----------------------------------------|-----------------------------------------|-----------------------------------------|----------------------|-------------------------|
| *02                    | 272 (38.97)                            | 198 (32.78)                            | 561 (35.78)                             | 442 (29.66)                             | 1584 (38.90)         | 913 (24.28)             |
| *04                    | 10 (1.43)                              | 9 (1.49)                               | 54 (3.44)                               | 44 (2.95)                               | 100 (2.46)           | 85 (2.26)               |
| *0301                  | 41 (5.87)                              | 68 (11.26)                             | 76 (4.85)                               | 168 (11.28)                             | 244 (5.99)           | 682 (18.14)             |
| *0302                  | 262 (37.54)                            | 152 (25.17)                            | 607 (38.71)                             | 378 (25.37)                             | 1491 (36.62)         | 406 (10.80)             |
| *0303                  | 6 (0.86)                               | 20 (3.31)                              | 23 (1.47)                               | 45 (3.02)                               | 61 (1.50)            | 228 (6.06)              |
| *0304                  |                                        |                                        | 5 (0.32)                                | 3 (0.20)                                |                      |                         |
| *0305                  | 1 (0.14)                               | 2 (0.33)                               |                                         | 1 (0.07)                                |                      |                         |
| *0501                  | 61 (8.74)                              | 70 (11.59)                             | 115 (7.33)                              | 131 (8.79)                              | 388 (9.53)           | 451 (11.99)             |
| *0502                  | 8 (1.15)                               | 6 (0.99)                               | 34 (2.17)                               | 31 (2.08)                               | 22 (0.54)            | 18 (0.48)               |
| *0503                  |                                        | 3 (0.50)                               | 3 (0.19)                                | 22 (1.48)                               | 6 (0.15)             | 90 (2.39)               |
| *0504                  |                                        |                                        | 3 (0.19)                                | 2 (0.13)                                | 1 (0.02)             | 10 (0.27)               |
| *0601                  |                                        | 3 (0.50)                               | 2 (0.13)                                | 6 (0.40)                                | 3 (0.07)             | 18 (0.48)               |
| *0602                  | 6 (0.86)                               | 28 (4.64)                              | 8 (0.51)                                | 100 (6.71)                              | 12 (0.29)            | 501 (13.32)             |
| *0603                  | 12 (1.72)                              | 16 (2.65)                              | 19 (1.21)                               | 50 (3.36)                               | 41 (1.01)            | 197 (5.24)              |
| *0604                  | 17 (2.44)                              | 17 (2.81)                              | 51 (3.25)                               | 53 (3.56)                               | 110 (2.70)           | 116 (3.09)              |
| *0605                  |                                        |                                        | 3 (0.19)                                | 2 (0.13)                                |                      |                         |
| *0609                  | 1 (0.14)                               | 5 (0.83)                               | 2 (0.13)                                | 8 (0.54)                                | 9 (0.22)             | 45 (1.20)               |
| *03 <sup>a</sup>       |                                        |                                        |                                         | 1 (0.07)                                |                      |                         |
| *05 <sup>a</sup>       | 1 (0.14)                               | 4 (0.66)                               |                                         |                                         |                      |                         |
| *06 <sup>a</sup>       |                                        | 3 (0.50)                               | 2 (0.13)                                | 3 (0.20)                                |                      |                         |

(a) Some individuals carry rare alleles that could not be resolved into 4-digit subtypes, hence 2-digit alleles are reported.

Supplementary Table 1c | *HLA-DRB1* allele frequencies.

| <i>HLA-DRB1</i> allele | UK families, affected offspring, n (%) | UK families, unaffected parents, n (%) | USA families, affected offspring, n (%) | USA families, unaffected parents, n (%) | British cases, n (%) | British controls, n (%) |
|------------------------|----------------------------------------|----------------------------------------|-----------------------------------------|-----------------------------------------|----------------------|-------------------------|
| *01                    | 63 (9.03)                              | 73 (12.05)                             | 115 (7.34)                              | 128 (8.63)                              | 367 (9.39)           | 446 (11.77)             |
| *03                    | 261 (37.39)                            | 160 (26.40)                            | 510 (32.57)                             | 355 (23.92)                             | 1342 (34.34)         | 513 (13.54)             |
| *04 <sup>a</sup>       | 3 (0.43)                               | 3 (0.50)                               | 8 (0.51)                                | 4 (0.27)                                |                      | 1 (0.03)                |
| *06                    |                                        |                                        |                                         | 1 (0.07)                                |                      |                         |
| *07                    | 12 (1.72)                              | 52 (8.58)                              | 37 (2.36)                               | 104 (7.01)                              | 165 (4.22)           | 583 (15.39)             |
| *08                    | 11 (1.58)                              | 10 (1.65)                              | 51 (3.26)                               | 43 (2.90)                               | 100 (2.56)           | 86 (2.27)               |
| *09                    | 5 (0.72)                               | 5 (0.83)                               | 23 (1.47)                               | 20 (1.35)                               | 45 (1.15)            | 60 (1.58)               |
| *10                    | 2 (0.29)                               | 1 (0.17)                               | 7 (0.45)                                | 6 (0.40)                                | 5 (0.13)             | 21 (0.55)               |
| *11                    | 6 (0.86)                               | 18 (2.97)                              | 20 (1.28)                               | 80 (5.39)                               | 42 (1.08)            | 233 (6.15)              |
| *12                    |                                        | 3 (0.50)                               | 4 (0.26)                                | 13 (0.88)                               | 18 (0.46)            | 63 (1.66)               |
| *13                    | 32 (4.58)                              | 44 (7.26)                              | 83 (5.30)                               | 120 (8.09)                              | 165 (4.22)           | 377 (9.95)              |
| *14                    |                                        | 4 (0.66)                               | 1 (0.06)                                | 22 (1.48)                               | 4 (0.10)             | 88 (2.32)               |
| *15                    | 6 (0.86)                               | 33 (5.45)                              | 14 (0.89)                               | 109 (7.35)                              | 16 (0.41)            | 531 (14.02)             |
| *16                    | 7 (1.00)                               | 7 (1.16)                               | 31 (1.98)                               | 28 (1.89)                               | 21 (0.54)            | 22 (0.58)               |
| *0401 <sup>a</sup>     | 218 (31.23)                            | 136 (22.44)                            | 413 (26.37)                             | 264 (17.79)                             | 1119 (28.63)         | 423 (11.17)             |
| *0402 <sup>a</sup>     | 6 (0.86)                               | 6 (0.99%)                              | 53 (3.38)                               | 42 (2.83)                               | 46 (1.18)            | 14 (0.37)               |
| *0403 <sup>a</sup>     |                                        | 3 (0.50%)                              | 15 (0.96)                               | 19 (1.28)                               | 25 (0.64)            | 98 (2.59)               |
| *0404 <sup>a</sup>     | 50 (7.16)                              | 38 (6.27)                              | 131 (8.37)                              | 95 (6.40)                               | 330 (8.44)           | 215 (5.68)              |
| *0405 <sup>a</sup>     | 16 (2.29)                              | 10 (1.65)                              | 50 (3.19)                               | 31 (2.09)                               | 98 (2.51)            | 14 (0.37)               |

(a) Only \*0401, \*0402, \*0403, \*0404 and \*0405 subtypes of the DRB1\*04 type were distinguished. When the subtype could not be resolved we analysed it as DRB1\*04.

Supplementary Table 1d | *HLA-B* allele frequencies (two-digit resolution).

| <i>HLA-B</i> allele | UK families, affected offspring, n (%) | UK families, unaffected parents, n (%) | USA families, affected offspring, n (%) | USA families, unaffected parents, n (%) | British cases, n (%) | British controls, n (%) |
|---------------------|----------------------------------------|----------------------------------------|-----------------------------------------|-----------------------------------------|----------------------|-------------------------|
| *07                 | 51 (7.46)                              | 55 (9.34)                              | 124 (8.66)                              | 157 (11.67)                             | 249 (8.23)           | 465 (13.90)             |
| *08                 | 173 (25.29)                            | 114 (19.35)                            | 307 (21.44)                             | 229 (17.03)                             | 788 (26.06)          | 461 (13.78)             |
| *13                 | 8 (1.17)                               | 13 (2.21)                              | 20 (1.40)                               | 21 (1.56)                               | 43 (1.42)            | 56 (1.67)               |
| *14                 | 18 (2.63)                              | 21 (3.57)                              | 31 (2.16)                               | 40 (2.97)                               | 54 (1.79)            | 159 (4.75)              |
| *15                 | 91 (13.30)                             | 59 (10.02)                             | 189 (13.20)                             | 129 (9.59)                              | 388 (12.83)          | 267 (7.98)              |
| *18                 | 45 (6.58)                              | 29 (4.92)                              | 136 (9.50)                              | 100 (7.43)                              | 202 (6.68)           | 128 (3.83)              |
| *27                 | 36 (5.26)                              | 31 (5.26)                              | 53 (3.70)                               | 51 (3.79)                               | 113 (3.74)           | 145 (4.33)              |
| *35                 | 37 (5.41)                              | 41 (6.96)                              | 77 (5.38)                               | 103 (7.66)                              | 130 (4.30)           | 197 (5.89)              |
| *37                 |                                        | 7 (1.19)                               | 10 (0.70)                               | 10 (0.74)                               | 21 (0.69)            | 51 (1.52)               |
| *38                 | 4 (0.58)                               | 4 (0.68)                               | 17 (1.19)                               | 26 (1.93)                               | 10 (0.33)            | 26 (0.78)               |
| *39                 | 26 (3.80)                              | 12 (2.04)                              | 81 (5.66)                               | 50 (3.72)                               | 143 (4.73)           | 79 (2.36)               |
| *40                 | 58 (8.48)                              | 54 (9.17)                              | 115 (8.03)                              | 101 (7.51)                              | 257 (8.50)           | 232 (6.93)              |
| *41                 | 4 (0.58)                               | 2 (0.34)                               | 18 (1.26)                               | 16 (1.19)                               | 11 (0.36)            | 23 (0.69)               |
| *42                 |                                        |                                        |                                         | 1 (0.07)                                |                      |                         |
| *44                 | 62 (9.06)                              | 84 (14.26)                             | 131 (9.15)                              | 159 (11.82)                             | 344 (11.38)          | 567 (16.95)             |
| *45                 | 7 (1.02)                               | 6 (1.02)                               | 8 (0.56)                                | 6 (0.45)                                | 9 (0.30)             | 26 (0.78)               |
| *46                 |                                        |                                        |                                         |                                         | 1 (0.03)             |                         |
| *47                 | 3 (0.44)                               | 3 (0.51)                               | 2 (0.14)                                | 2 (0.15)                                | 9 (0.30)             | 8 (0.24)                |
| *49                 | 8 (1.17)                               | 5 (0.85)                               | 22 (1.54)                               | 15 (1.12)                               | 38 (1.26)            | 34 (1.02)               |
| *50                 | 8 (1.17)                               | 3 (0.51)                               | 16 (1.12)                               | 13 (0.97)                               | 42 (1.39)            | 35 (1.05)               |
| *51                 | 17 (2.49)                              | 15 (2.55)                              | 40 (2.79)                               | 45 (3.35)                               | 78 (2.58)            | 109 (3.26)              |
| *52                 | 2 (0.29)                               | 2 (0.34)                               | 4 (0.28)                                | 8 (0.59)                                | 3 (0.10)             | 20 (0.60)               |
| *53                 |                                        |                                        | 1 (0.07)                                | 6 (0.45)                                | 3 (0.10)             | 9 (0.27)                |
| *55                 | 15 (2.19)                              | 8 (1.36)                               | 10 (0.70)                               | 12 (0.89)                               | 37 (1.22)            | 71 (2.12)               |
| *56                 | 1 (0.15)                               | 2 (0.34)                               | 5 (0.35)                                | 6 (0.45)                                | 14 (0.46)            | 16 (0.48)               |
| *57                 | 5 (0.73)                               | 16 (2.72)                              | 7 (0.49)                                | 28 (2.08)                               | 26 (0.86)            | 143 (4.27)              |
| *58                 | 3 (0.44)                               | 2 (0.34)                               | 8 (0.56)                                | 9 (0.67)                                | 11 (0.36)            | 19 (0.57)               |
| *70                 | 2 (0.29)                               | 1 (0.17)                               |                                         | 1 (0.07)                                |                      |                         |



Supplementary Table 1e | *HLA-B* allele frequencies (four-digit resolution).

| <i>HLA-B</i> allele | Families, affected offspring, n (%) | Families, unaffected parents, n (%) | British case, n (%) | British controls, n (%) |
|---------------------|-------------------------------------|-------------------------------------|---------------------|-------------------------|
| *0702               | 176 (5.39)                          | 246 (8.09)                          | 238 (7.94)          | 453 (13.82)             |
| *0704               |                                     | 1 (0.03)                            |                     |                         |
| *0705               | 3 (0.09)                            | 4 (0.13)                            |                     |                         |
| *0726               |                                     |                                     | 1 (0.03)            |                         |
| *0801               | 793 (24.29)                         | 581 (19.11)                         | 783 (26.13)         | 453 (13.82)             |
| *0802               |                                     | 1 (0.03)                            |                     |                         |
| *1302               | 39 (1.19)                           | 45 (1.48)                           | 43 (1.44)           | 56 (1.71)               |
| *1401               | 15 (0.46)                           | 17 (0.56)                           | 12 (0.40)           | 58 (1.77)               |
| *1402               | 46 (1.41)                           | 50 (1.64)                           | 41 (1.37)           | 98 (2.99)               |
| *1501               | 346 (10.60)                         | 243 (7.99)                          | 347 (11.58)         | 222 (6.77)              |
| *1503               | 2 (0.06)                            | 1 (0.03)                            | 3 (0.10)            | 5 (0.15)                |
| *1504               | 1 (0.03)                            |                                     |                     |                         |
| *1507               | 2 (0.06)                            | 1 (0.03)                            | 2 (0.07%)           | 3 (0.09)                |
| *1508               | 1 (0.03)                            | 1 (0.03)                            | 1 (0.03%)           | 1 (0.03)                |
| *1509               |                                     | 1 (0.03)                            | 1 (0.03%)           | 1 (0.03)                |
| *1510               | 4 (0.12)                            | 2 (0.07)                            |                     |                         |
| *1514               |                                     |                                     |                     | 1 (0.03)                |
| *1515               | 1 (0.03)                            | 3 (0.10)                            |                     |                         |
| *1516               | 1 (0.03)                            | 2 (0.07)                            | 1 (0.03)            | 3 (0.09)                |
| *1517               | 8 (0.25)                            | 6 (0.20)                            | 3 (0.10)            | 8 (0.24)                |
| *1518               | 11 (0.34)                           | 9 (0.30)                            | 12 (0.40)           | 14 (0.43)               |
| *1524               | 2 (0.06)                            | 2 (0.07)                            | 1 (0.03)            | 1 (0.03)                |
| *1537               | 4 (0.12)                            | 1 (0.03)                            |                     |                         |
| *1571               |                                     | 1 (0.03)                            |                     |                         |
| *1801               | 252 (7.72)                          | 188 (6.18)                          | 200 (6.68)          | 123 (3.75)              |
| *1802               |                                     | 2 (0.07)                            |                     |                         |
| *1812               | 3 (0.09)                            |                                     |                     |                         |
| *2701               |                                     | 1 (0.03)                            |                     | 2 (0.06)                |
| *2702               | 1 (0.03)                            | 3 (0.10)                            | 3 (0.10)            | 2 (0.06)                |
| *2705               | 60 (1.84)                           | 62 (2.04)                           | 108 (3.60)          | 140 (4.27)              |
| *2707               | 1 (0.03)                            | 1 (0.03)                            |                     |                         |
| *2719               |                                     | 1 (0.03)                            |                     |                         |
| *3501               | 59 (1.81)                           | 73 (2.40)                           | 67 (2.24%)          | 122 (3.72)              |
| *3502               | 1 (0.03)                            | 6 (0.20)                            |                     | 7 (0.21)                |
| *3503               | 8 (0.25)                            | 8 (0.26)                            | 6 (0.20)            | 17 (0.52)               |
| *3508               | 9 (0.28)                            | 7 (0.23)                            | 5 (0.17)            | 5 (0.15)                |
| *3513               |                                     | 1 (0.03)                            |                     |                         |
| *3701               | 22 (0.67)                           | 29 (0.95)                           | 21 (0.70)           | 50 (1.53)               |
| *3801               | 21 (0.64)                           | 27 (0.89)                           | 10 (0.33)           | 23 (0.70)               |
| *3901               | 26 (0.80)                           | 24 (0.79)                           | 43 (1.44)           | 34 (1.04)               |
| *3906               | 63 (1.93)                           | 40 (1.32)                           | 87 (2.90)           | 40 (1.22)               |
| *3928               |                                     |                                     |                     | 1 (0.03)                |
| *4001               | 172 (5.27)                          | 155 (5.10)                          | 239 (7.98)          | 197 (6.01)              |
| *4002               | 19 (0.5)                            | 27 (0.89)                           | 17 (0.57)           | 29 (0.88)               |
| *4006               | 1 (0.03)                            | 2 (0.07)                            |                     |                         |
| *4101               | 10 (0.31)                           | 14 (0.46)                           | 10 (0.33)           | 9 (0.27)                |

|                  |            |            |            |             |
|------------------|------------|------------|------------|-------------|
| *4102            | 4 (0.12)   | 8 (0.26)   | 1 (0.03)   | 8 (0.24)    |
| *4202            |            | 1 (0.03)   |            | 1 (0.03)    |
| *4402            | 169 (5.18) | 199 (6.54) | 256 (8.54) | 367 (11.20) |
| *4403            | 60 (1.84)  | 94 (3.09)  | 75 (2.50)  | 165 (5.03)  |
| *4404            |            |            |            | 4 (0.12)    |
| *4405            | 2 (0.06)   | 1 (0.03)   | 1 (0.03)   | 1 (0.03)    |
| *4414            |            |            | 1 (0.03)   |             |
| *4501            | 8 (0.25)   | 8 (0.26)   | 9 (0.30)   | 26 (0.79)   |
| *4601            |            |            | 1 (0.03)   |             |
| *4701            | 13 (0.40)  | 10 (0.33)  | 9 (0.30)   | 8 (0.24)    |
| *4801            |            | 1 (0.03)   |            |             |
| *4901            | 42 (1.29)  | 36 (1.18)  | 38 (1.27)  | 33 (1.01)   |
| *5001            | 40 (1.23)  | 31 (1.02)  | 40 (1.34)  | 34 (1.04)   |
| *5002            | 3 (0.09)   | 2 (0.07)   |            |             |
| *5101            | 55 (1.68)  | 66 (2.17)  | 69 (2.30)  | 89 (2.72)   |
| *5108            | 2 (0.06)   | 2 (0.07)   | 2 (0.07)   |             |
| *5201            | 7 (0.21)   | 14 (0.46)  | 2 (0.07)   | 18 (0.55)   |
| *5301            | 2 (0.06)   | 8 (0.26)   | 1 (0.03)   | 9 (0.27)    |
| *5501            | 41 (1.26)  | 41 (1.35)  | 37 (1.23)  | 71 (2.17)   |
| *5601            | 9 (0.28)   | 10 (0.33)  | 14 (0.47)  | 15 (0.46)   |
| *5701            | 24 (0.74)  | 60 (1.97)  | 26 (0.87)  | 142 (4.33)  |
| *5702            |            | 1 (0.03)   |            |             |
| *5706            |            | 2 (0.07)   |            |             |
| *5801            | 15 (0.46)  | 16 (0.53)  | 11 (0.37)  | 18 (0.55)   |
| *5804            | 1 (0.03)   |            |            |             |
| *07 <sup>a</sup> | 102 (3.12) | 92 (3.03)  | 8 (0.27)   | 3 (0.09)    |
| *14 <sup>a</sup> | 13 (0.40)  | 20 (0.66)  |            |             |
| *15 <sup>a</sup> | 60 (1.84)  | 39 (1.28)  | 14 (0.47)  | 4 (0.12)    |
| *22 <sup>a</sup> | 1 (0.03)   |            |            |             |
| *27 <sup>a</sup> | 64 (1.96)  | 58 (1.91)  |            |             |
| *35 <sup>a</sup> | 79 (2.42)  | 98 (3.22)  | 51 (1.70)  | 38 (1.16)   |
| *38 <sup>a</sup> | 6 (0.18)   | 10 (0.33)  |            |             |
| *39 <sup>a</sup> | 52 (1.59)  | 28 (0.92)  | 13 (0.43)  |             |
| *40 <sup>a</sup> | 84 (2.57)  | 62 (2.04)  |            | 1 (0.03)    |
| *41 <sup>a</sup> | 13 (0.40)  | 7 (0.23)   |            | 6 (0.18)    |
| *44 <sup>a</sup> | 77 (2.36)  | 90 (2.96)  | 5 (0.17)   | 20 (0.61)   |
| *45 <sup>a</sup> | 8 (0.25)   | 7 (0.23)   |            |             |
| *50 <sup>a</sup> |            |            | 1 (0.03)   |             |
| *51 <sup>a</sup> | 23 (0.70)  | 25 (0.82)  | 4 (0.13)   | 19 (0.58)   |
| *53 <sup>a</sup> |            | 3 (0.10)   | 2 (0.07)   |             |
| *70 <sup>a</sup> | 2 (0.06)   | 2 (0.07)   |            |             |
| *78 <sup>a</sup> |            | 1 (0.03)   |            |             |

(a) Individuals that could not be resolved to the four-digit subtypes are reported as two-digit types.

Supplementary Table 1f | *HLA-A* allele frequencies.

| <i>HLA-A</i> allele | UK families, affected offspring, n (%) | UK families, unaffected parents, n (%) | USA families, affected offspring, n (%) | USA families, unaffected parents, n (%) | British cases, n (%) | British controls, n (%) |
|---------------------|----------------------------------------|----------------------------------------|-----------------------------------------|-----------------------------------------|----------------------|-------------------------|
| *01                 | 143 (21.97)                            | 123 (22.78)                            | 207 (20.76)                             | 186 (18.06)                             | 648 (21.40)          | 638 (18.14)             |
| *02                 | 209 (32.10)                            | 180 (33.33)                            | 345 (34.60)                             | 324 (31.46)                             | 1021 (33.72)         | 1034 (29.39)            |
| *03                 | 95 (14.59)                             | 67 (12.41)                             | 110 (11.03)                             | 125 (12.14)                             | 380 (12.55)          | 493 (14.01)             |
| *11                 | 32 (4.92)                              | 33 (6.11)                              | 34 (3.41)                               | 46 (4.47)                               | 99 (3.27)            | 229 (6.51)              |
| *23                 | 5 (0.77)                               | 6 (1.11)                               | 11 (1.10)                               | 14 (1.36)                               | 24 (0.79)            | 46 (1.31)               |
| *24                 | 62 (9.52)                              | 47 (8.70)                              | 124 (12.44)                             | 107 (10.39)                             | 331 (10.93)          | 265 (7.53)              |
| *25                 | 7 (1.08)                               | 4 (0.74)                               | 17 (1.71)                               | 21 (2.04)                               | 39 (1.29)            | 64 (1.82)               |
| *26                 | 13 (2.00)                              | 10 (1.85)                              | 40 (4.01)                               | 37 (3.59)                               | 38 (1.25)            | 85 (2.42)               |
| *29                 | 15 (2.30)                              | 17 (3.15)                              | 29 (2.91)                               | 35 (3.40)                               | 93 (3.07)            | 161 (4.58)              |
| *30                 | 20 (3.07)                              | 21 (3.89)                              | 33 (3.31)                               | 27 (2.62)                               | 102 (3.37)           | 82 (2.33)               |
| *31                 | 21 (3.23)                              | 23 (4.26)                              | 25 (2.51)                               | 23 (2.23)                               | 62 (2.05)            | 106 (3.01)              |
| *32                 | 8 (1.23)                               | 8 (1.48)                               | 18 (1.81)                               | 28 (2.72)                               | 80 (2.64)            | 130 (3.70)              |
| *33                 | 6 (0.92)                               |                                        | 1 (0.10)                                | 5 (0.49)                                | 23 (0.76)            | 30 (0.85)               |
| *34                 |                                        |                                        |                                         | 1 (0.10)                                | 3 (0.10)             | 4 (0.11)                |
| *36                 |                                        |                                        |                                         | 1 (0.10)                                |                      |                         |
| *66                 |                                        | 1 (0.19)                               | 3 (0.30)                                | 5 (0.49)                                | 3 (0.10)             | 12 (0.34)               |
| *68                 | 15 (2.30)                              |                                        |                                         | 42 (4.08)                               | 78 (2.58)            | 136 (3.87)              |
| *69                 |                                        |                                        |                                         | 2 (0.19)                                | 1 (0.03)             | 1 (0.03)                |
| *74                 |                                        |                                        |                                         | 1 (0.10)                                | 3 (0.10)             | 2 (0.06)                |

Supplementary Table 1g | *HLA-DPB1* allele frequencies in the T1D families.

| <i>HLA-DPB1</i><br>allele | Affected<br>offspring, n(%) | Unaffected<br>parents, n (%) |
|---------------------------|-----------------------------|------------------------------|
| *0101                     | 107 (8.83)                  | 122 (7.43)                   |
| *0201                     | 141 (11.63)                 | 192 (11.69)                  |
| *0202                     | 34 (2.81)                   | 27 (1.64)                    |
| *0301                     | 201 (16.58)                 | 241 (14.68)                  |
| *0401                     | 499 (41.17)                 | 699 (42.57)                  |
| *0402                     | 64 (5.28)                   | 129 (7.86)                   |
| *0404                     | 2 (0.17)                    | 1 (0.06)                     |
| *0501                     | 15 (1.24)                   | 23 (1.40)                    |
| *0601                     | 37 (3.05)                   | 37 (2.25)                    |
| *0801                     | 1 (0.08)                    | 3 (0.18)                     |
| *0901                     | 4 (0.33)                    | 10 (0.61)                    |
| *1001                     | 20 (1.65)                   | 28 (1.71)                    |
| *1101                     | 10 (0.83)                   | 27 (1.64)                    |
| *1301                     | 17 (1.40)                   | 27 (1.64)                    |
| *1401                     | 14 (1.16)                   | 21 (1.28)                    |
| *1501                     | 22 (1.82)                   | 22 (1.34)                    |
| *1601                     | 3 (0.25)                    | 3 (0.18)                     |
| *1701                     | 3 (0.25)                    | 11 (0.67)                    |
| *1901                     | 9 (0.74)                    | 8 (0.49)                     |
| *2001                     | 7 (0.58)                    | 7 (0.43)                     |
| *2301                     | 0 (0)                       | 2 (0.12)                     |
| *3401                     | 0 (0)                       | 1 (0.06)                     |
| *5901                     | 2 (0.17)                    | 1 (0.06)                     |

Supplementary Table 1h | Allele frequencies of *HLA-C* in the T1D families.

| Allele | UK affected offspring, n(%) | UK unaffected parents, n(%) | USA affected offspring, n(%) | USA unaffected parents, n(%) |
|--------|-----------------------------|-----------------------------|------------------------------|------------------------------|
| *01    | 18 (2.80)                   | 23 (4.09)                   | 31 (2.48)                    | 32 (2.68)                    |
| *02    | 24 (3.74)                   | 21 (3.74)                   | 54 (4.33)                    | 52 (4.36)                    |
| *03    | 139 (21.65)                 | 105 (18.68)                 | 247 (19.79)                  | 187 (15.69)                  |
| *04    | 37 (5.76)                   | 41 (7.30)                   | 72 (5.77)                    | 108 (9.06)                   |
| *05    | 85 (13.24)                  | 75 (13.35)                  | 159 (12.74)                  | 142 (11.91)                  |
| *06    | 30 (4.67)                   | 45 (8.01)                   | 55 (4.41)                    | 73 (6.12)                    |
| *07    | 249 (38.79)                 | 188 (33.45)                 | 482 (38.62)                  | 437 (36.66)                  |
| *08    | 14 (2.18)                   | 18 (3.20)                   | 20 (1.60)                    | 21 (1.76)                    |
| *09    | 2 (0.31)                    | 1 (0.18)                    |                              |                              |
| *10    | 1 (0.16)                    | 4 (0.71)                    |                              |                              |
| *12    | 23 (3.58)                   | 15 (2.67)                   | 59 (4.73)                    | 67 (5.52)                    |
| *14    | 2 (0.31)                    | 2 (0.36)                    | 7 (0.56)                     | 12 (1.01)                    |
| *15    | 11 (1.71)                   | 9 (1.60)                    | 29 (2.32)                    | 24 (2.01)                    |
| *16    | 6 (0.93)                    | 14 (2.49)                   | 19 (1.52)                    | 23 (1.93)                    |
| *17    | 1 (0.16)                    | 1 (0.18)                    | 14 (1.12)                    | 14 (1.17)                    |

**Supplementary Table 2a | *P*-values for association tests in the T1D families without and with conditioning on the MHC class II effects.**

| Locus              | Position, chr 6 | Locus type     | Gene    | Without conditioning   | With conditioning on <i>HLA-DQB1</i> and <i>HLA-DRB1</i> |
|--------------------|-----------------|----------------|---------|------------------------|----------------------------------------------------------|
| D6S1691            | 24,032,524      | Microsatellite |         | 0.0013                 | 0.615                                                    |
| D6S2239            | 26,181,749      | Microsatellite |         | 0.03                   | 0.923                                                    |
| D6S2223            | 27,765,822      | Microsatellite |         | 0.093                  | 0.203                                                    |
| D6S306             | 28,034,082      | Microsatellite |         | 0.055                  | 0.106                                                    |
| D6S2222            | 28,041,225      | Microsatellite |         | 0.41                   | 0.054                                                    |
| D6S258             | 29,128,778      | Microsatellite |         | 0.0098                 | 0.061                                                    |
| D6S1683            | 29,260,683      | Microsatellite |         | 0.155                  | 0.607                                                    |
| HLA-A (two-digit)  | 30,018,305      | Gene           | HLA-A   | $1.3 \times 10^{-6}$   | 0.067                                                    |
| D6S265             | 30,127,492      | Microsatellite |         | 0.689                  | 0.992                                                    |
| rs2844697          | 31,040,288      | SNP            | DPCR1   | $3.41 \times 10^{-15}$ | 0.210                                                    |
| HLA-C (two-digit)  | 31,344,505      | Gene           | HLA-C   | $8.04 \times 10^{-19}$ | 0.286                                                    |
| HLA-B (two-digit)  | 31,429,628      | Gene           | HLA-B   | $3.44 \times 10^{-30}$ | $4.19 \times 10^{-7}$                                    |
| Bw4/Bw6            | 31,429,628      | Epitope        | HLA-B   | $2.43 \times 10^{-18}$ | $6.57 \times 10^{-6}$                                    |
| MIB                | 31,457,335      | Microsatellite |         | $1.2 \times 10^{-5}$   | 0.303                                                    |
| MICA (three-digit) | 31,476,505      | Gene           | MICA    | $1.82 \times 10^{-10}$ | 0.081                                                    |
| MICA-STR           | 31,488,134      | Microsatellite | MICA    | $2.4 \times 10^{-6}$   | 0.762                                                    |
| MICB (three-digit) | 31,573,871      | Gene           | MICB    | $1.96 \times 10^{-15}$ | 0.028                                                    |
| rs2071592          | 31,623,319      | SNP            | NFKBIL1 | $8.2 \times 10^{-4}$   | 0.971                                                    |
| rs3130062          | 31,633,891      | SNP            | NFKBIL1 | $2.1 \times 10^{-4}$   | 0.621                                                    |
| TNFA               | 31,643,339      | Microsatellite |         | $7.41 \times 10^{-13}$ | 0.782                                                    |
| rs2239704          | 31,648,120      | SNP            | LTA     | $2.2 \times 10^{-7}$   | 0.996                                                    |
| rs909253           | 31,648,292      | SNP            | LTA     | $1.7 \times 10^{-3}$   | 0.753                                                    |
| TNFC               | 31,648,344      | Microsatellite |         | 0.187                  | 0.070                                                    |
| rs746868           | 31,648,408      | SNP            | LTA     | $6.65 \times 10^{-8}$  | 0.824                                                    |
| rs2857713          | 31,648,535      | SNP            | LTA     | 0.072                  | 0.279                                                    |
| rs3093543          | 31,648,736      | SNP            | LTA     | 0.313                  | 0.697                                                    |
| rs1041981          | 31,648,763      | SNP            | LTA     | $5.1 \times 10^{-3}$   | 0.441                                                    |
| rs1799964          | 31,650,287      | SNP            | TNFA    | $6.0 \times 10^{-3}$   | 0.556                                                    |
| rs1800630          | 31,650,455      | SNP            | TNFA    | 0.026                  | 0.077                                                    |
| rs1799724          | 31,650,461      | SNP            | TNFA    | 0.204                  | 0.229                                                    |
| rs1800750          | 31,650,942      | SNP            | TNFA    | $1.09 \times 10^{-7}$  | 0.038                                                    |
| rs3091256          | 31,651,010      | SNP            | TNFA    | $4.83 \times 10^{-12}$ | 0.690                                                    |
| rs361525           | 31,651,080      | SNP            | TNFA    | 0.587                  | 0.071                                                    |
| rs1800610          | 31,651,806      | SNP            | TNFA    | 0.144                  | 0.316                                                    |
| TNFE               | 31,663,889      | Microsatellite |         | 0.198                  | 0.497                                                    |
| TNFD               | 31,664,102      | Microsatellite |         | $8.2 \times 10^{-7}$   | 0.608                                                    |
| rs11575842         | 31,665,205      | SNP            | NCR3    | $2.2 \times 10^{-3}$   | 0.755                                                    |
| rs11575836         | 31,668,681      | SNP            | NCR3    | $6.8 \times 10^{-3}$   | 0.672                                                    |
| 82-1               | 31,685,369      | Microsatellite |         | $1.4 \times 10^{-6}$   | 0.288                                                    |
| D6S273             | 31,791,664      | Microsatellite |         | $2.8 \times 10^{-7}$   | 0.775                                                    |

|             |            |                |          |                         |                       |
|-------------|------------|----------------|----------|-------------------------|-----------------------|
| rs1065356   | 31,794,987 | SNP            | LY6G6C   | 0.133                   | 0.675                 |
| rs805294    | 31,796,196 | SNP            | LY6G6C   | $3.47 \times 10^{-13}$  | 0.517                 |
| rs805292    | 31,797,988 | SNP            | LY6G6C   | 0.188                   | 0.961                 |
| rs805306    | 31,800,142 | SNP            | C6orf25  | $2.15 \times 10^{-13}$  | 0.326                 |
| D3A         | 32,231,288 | Microsatellite |          | $1.68 \times 10^{-14}$  | 0.093                 |
| BTNL2-P393Q | 32,470,681 | SNP            | BTNL2    | $9.48 \times 10^{-8}$   | 0.451                 |
| rs28362677  | 32,470,719 | SNP            | BTNL2    | $2.5 \times 10^{-7}$    | 0.540                 |
| rs28362678  | 32,470,723 | SNP            | BTNL2    | $7.7 \times 10^{-6}$    | 0.791                 |
| rs2076530   | 32,471,794 | SNP            | BTNL2    | $5.86 \times 10^{-8}$   | 0.562                 |
| rs2076523   | 32,478,813 | SNP            | BTNL2    | $4.19 \times 10^{-13}$  | 0.423                 |
| HLA-DRB1    | 32,654,524 | Gene           | HLA-DRB1 | $2.13 \times 10^{-124}$ | NA                    |
| HLA-DQA1    | 32,713,112 | Gene           | HLA-DQA1 | $4.99 \times 10^{-31}$  | 0.082                 |
| HLA-DQB1    | 32,735,222 | Gene           | HLA-DQB1 | $6.45 \times 10^{-117}$ | NA                    |
| D6S2444     | 32,825,065 | Microsatellite |          | $2.90 \times 10^{-24}$  | 0.007                 |
| rs2621330   | 32,889,502 | SNP            | HLA-DOB  | 0.023                   | 0.120                 |
| rs7749688   | 32,889,532 | SNP            | HLA-DOB  | $1.4 \times 10^{-5}$    | 0.914                 |
| rs2071554   | 32,892,654 | SNP            | HLA-DOB  | $1.72 \times 10^{-19}$  | 0.025                 |
| rs241448    | 32,904,663 | SNP            | TAP2     | $6.85 \times 10^{-21}$  | $5.29 \times 10^{-5}$ |
| rs241447    | 32,904,729 | SNP            | TAP2     | $1.62 \times 10^{-21}$  | $1.45 \times 10^{-4}$ |
| rs4148876   | 32,904,771 | SNP            | TAP2     | $1.06 \times 10^{-7}$   | 0.552                 |
| rs2228396   | 32,905,787 | SNP            | TAP2     | 0.183                   | 0.311                 |
| rs1057149   | 32,922,920 | SNP            | TAP1     | 0.358                   | 0.913                 |
| rs1800453   | 32,922,953 | SNP            | TAP1     | 0.014                   | 0.695                 |
| rs17885274  | 32,924,750 | SNP            | TAP1     | 0.92                    | 0.294                 |
| rs4148880   | 32,926,752 | SNP            | TAP1     | 0.687                   | 0.282                 |
| PPP1R2P1-fs | 32,955,287 | SNP            | PPP1R2P1 | 0.165                   | 0.952                 |
| D6S2445     | 32,965,120 | Microsatellite |          | $2.49 \times 10^{-11}$  | 0.019                 |
| rs1042337   | 33,012,959 | SNP            | HLA-DMB  | $4.9 \times 10^{-4}$    | 0.492                 |
| rs2071555   | 33,013,064 | SNP            | HLA-DMB  | $5.3 \times 10^{-3}$    | 0.846                 |
| rs17214044  | 33,025,389 | SNP            | HLA-DMA  | $2.5 \times 10^{-3}$    | 0.041                 |
| rs17879829  | 33,025,390 | SNP            | HLA-DMA  | 0.352                   | 0.702                 |
| rs6926628   | 33,025,476 | SNP            | HLA-DMA  | $9.1 \times 10^{-4}$    | 0.026                 |
| rs1063478   | 33,025,522 | SNP            | HLA-DMA  | $5.5 \times 10^{-7}$    | 0.012                 |
| HLA-DPB1    | 33,151,681 | Gene           | HLA-DPB1 | $2.5 \times 10^{-3}$    | $2.21 \times 10^{-5}$ |
| D6S1560     | 33,662,673 | Microsatellite |          | 0.191                   | 0.878                 |
| rs2296336   | 33,744,638 | SNP            | ITPR3    | 0.268                   | 0.959                 |
| D6S1629     | 33,895,781 | Microsatellite |          | 0.463                   | 0.779                 |
| D6S1568     | 34,163,523 | Microsatellite |          | 0.96                    | 0.555                 |
| D6S439      | 35,260,058 | Microsatellite |          | 0.074                   | 0.287                 |
| D6S291      | 36,373,494 | Microsatellite |          | 0.062                   | 0.635                 |
| D6S1576     | 36,649,673 | Microsatellite |          | 0.013                   | 0.699                 |
| D6S1548     | 37,652,125 | Microsatellite |          | 0.222                   | 0.570                 |
| D6S1641     | 39,886,845 | Microsatellite |          | 0.328                   | 0.658                 |

NA = Not applicable

**Supplementary Table 2b | *P*-values for association tests in the first case-control set without and with conditioning on the MHC class II associations.**

| Locus      | Gene       | Position, chr 6 | Without conditioning  | With conditioning on <i>HLA-DQB1</i> and <i>HLA-DRB1</i> |
|------------|------------|-----------------|-----------------------|----------------------------------------------------------|
| rs9461102  | CMAH       | 25,205,277      | 0.41                  | 0.667                                                    |
| rs7774557  | CMAH       | 25,214,642      | 0.45                  | 0.682                                                    |
| rs9358856  | LRRC16     | 25,534,747      | 0.49                  | 0.927                                                    |
| rs1012899  | LRRC16     | 25,713,070      | 3.8x10 <sup>-5</sup>  | 0.504                                                    |
| rs11754288 | SLC17A4    | 25,884,928      | 0.045                 | 0.045                                                    |
| rs1165196  | SLC17A1    | 25,921,129      | 6.9x10 <sup>-3</sup>  | 0.101                                                    |
| rs2230653  | HIST1H1C   | 26,164,583      | 1                     | 0.801                                                    |
| rs1045537  | HFE        | 26,204,727      | 3.3x10 <sup>-7</sup>  | 0.482                                                    |
| rs198845   | HIST1H1T   | 26,215,769      | 0.043                 | 0.844                                                    |
| rs2051542  | HIST1H1T   | 26,216,147      | 0.16                  | 0.661                                                    |
| rs198844   | HIST1H1T   | 26,216,261      | 0.62                  | 0.334                                                    |
| rs7745238  | BTN2A3     | 26,531,296      | 0.32                  | 0.804                                                    |
| rs10946829 | BTN2A3     | 26,534,466      | 0.10                  | 0.832                                                    |
| rs2893848  | BTN2A3     | 26,538,960      | 0.41                  | 0.798                                                    |
| rs3736781  | BTN1A1     | 26,613,341      | 2.7x10 <sup>-5</sup>  | 0.298                                                    |
| rs2235233  | POM121L2   | 27,387,831      | 0.11                  | 0.870                                                    |
| rs9357037  | ZNF204     | 27,435,328      | 0.076                 | 0.779                                                    |
| rs10807020 | Q8NAI6     | 27,464,881      | 0.014                 | 0.624                                                    |
| rs2076305  | Q9UJN8     | 27,483,590      | 0.049                 | 5.85x10 <sup>-3</sup>                                    |
| rs1883216  | ZNF184     | 27,533,164      | 0.60                  | 0.039                                                    |
| rs200484   | HIST1H2BL  | 27,883,653      | 1.8x10 <sup>-8</sup>  | 0.039                                                    |
| rs9380030  | OR2B6      | 28,033,806      | 1                     | 0.340                                                    |
| rs203877   | ZNF165     | 28,156,603      | 8.9x10 <sup>-12</sup> | 0.830                                                    |
| rs1150674  | intergenic | 28,242,347      | 3.3x10 <sup>-5</sup>  | 0.315                                                    |
| rs1150684  | intergenic | 28,264,292      | 0.22                  | 0.726                                                    |
| rs12000    | C6orf194   | 28,335,415      | 3.7x10 <sup>-3</sup>  | 0.166                                                    |
| rs1635     | C6orf194   | 28,335,583      | 0.12                  | 0.050                                                    |
| rs1679709  | C6orf194   | 28,336,321      | 1.1x10 <sup>-8</sup>  | 8.53x10 <sup>-3</sup>                                    |
| rs3800325  | PGBD1      | 28,372,671      | 4.7x10 <sup>-3</sup>  | 0.827                                                    |
| rs1997660  | PGBD1      | 28,377,642      | 1.8x10 <sup>-3</sup>  | 0.124                                                    |
| rs853684   | ZNF323     | 28,402,529      | 2.5x10 <sup>-5</sup>  | 0.446                                                    |
| rs733743   | ZKSCAN3    | 28,435,350      | 0.65                  | 0.421                                                    |
| rs1361385  | ZSCAN12    | 28,466,299      | 6.1x10 <sup>-3</sup>  | 0.724                                                    |
| rs406113   | GPX6       | 28,591,461      | 0.060                 | 0.547                                                    |
| rs1233627  | intergenic | 28,859,706      | 6.3x10 <sup>-4</sup>  | 0.255                                                    |
| rs209165   | intergenic | 28,937,465      | 0.55                  | 0.114                                                    |
| rs2071790  | C6orf100   | 29,019,781      | 1.0x10 <sup>-9</sup>  | 0.723                                                    |
| rs6456880  | ZNF311     | 29,071,227      | 0.33                  | 0.329                                                    |
| rs3131085  | intergenic | 29,152,680      | 3.5x10 <sup>-4</sup>  | 0.013                                                    |
| rs3116856  | OR2J2      | 29,249,828      | 3.7x10 <sup>-16</sup> | 0.719                                                    |
| rs3116817  | OR2J4P     | 29,257,540      | 6.6x10 <sup>-16</sup> | 0.696                                                    |
| rs3116818  | OR2J4P     | 29,257,584      | 5.8x10 <sup>-7</sup>  | 0.847                                                    |



|                   |            |            |                        |                        |
|-------------------|------------|------------|------------------------|------------------------|
| rs3117328         | LOC651503  | 29,338,556 | $6.3 \times 10^{-5}$   | 0.088                  |
| rs3130827         | LOC651503  | 29,338,662 | $2.8 \times 10^{-6}$   | 0.162                  |
| rs9257694         | OR5U1      | 29,382,465 | $1.6 \times 10^{-7}$   | 0.147                  |
| rs9257770         | OR11A1     | 29,431,817 | 1                      | 0.019                  |
| rs3749971         | OR12D3     | 29,450,754 | $4.4 \times 10^{-5}$   | 0.030                  |
| rs3128853         | O12D2      | 29,472,766 | $9.6 \times 10^{-6}$   | 0.700                  |
| rs2073154         | O12D2      | 29,472,794 | $2.1 \times 10^{-11}$  | 0.528                  |
| rs2073151         | O12D2      | 29,472,930 | $1.8 \times 10^{-11}$  | 0.473                  |
| rs2074469         | OR10C1     | 29,515,949 | 0.036                  | 0.199                  |
| rs2074468         | OR10C1     | 29,516,249 | $1.4 \times 10^{-4}$   | 0.358                  |
| rs2074466         | OR10C1     | 29,516,292 | $2.5 \times 10^{-4}$   | 0.582                  |
| rs3131020         | intergenic | 29,583,881 | $2.9 \times 10^{-11}$  | 0.38                   |
| rs1233478         | intergenic | 29,585,800 | $1.14 \times 10^{-17}$ | 0.62                   |
| rs389419          | OR2I1      | 29,629,424 | $2.57 \times 10^{-21}$ | 0.001                  |
| rs2076487         | UBD        | 29,631,838 | 0.98                   | 0.201                  |
| rs2076486         | UBD        | 29,631,851 | 0.88                   | 0.213                  |
| rs2076484         | UBD        | 29,631,982 | 0.78                   | 0.515                  |
| rs740884          | GABR1      | 29,682,610 | 0.61                   | 0.410                  |
| rs2535241         | ZFP57      | 29,748,764 | 1                      | 0.093                  |
| rs1611209         | LOC554223  | 29,867,902 | $3.7 \times 10^{-3}$   | $2.70 \times 10^{-3}$  |
| rs1610645         | LOC554223  | 29,867,975 | 0.042                  | 0.013                  |
| rs885937          | LOC554223  | 29,877,042 | 0.032                  | 0.029                  |
| HLA-A (two-digit) | HLA-A      | 30,018,305 | $1.6 \times 10^{-14}$  | $1.67 \times 10^{-10}$ |
| rs6904029         | HCG9       | 30,051,046 | $8.4 \times 10^{-8}$   | 0.135                  |
| rs3765604         | HLA-G      | 30,084,003 | $2.8 \times 10^{-3}$   | 0.774                  |
| rs356969          | HLA-J      | 30,085,124 | $2.7 \times 10^{-6}$   | 0.678                  |
| rs10484549        | C6orf12    | 30,134,269 | $1.3 \times 10^{-5}$   | 0.168                  |
| rs7770557         | ZNRD1      | 30,137,088 | $1.1 \times 10^{-4}$   | 0.942                  |
| rs2074479         | RNF39      | 30,148,988 | 0.018                  | 0.233                  |
| rs2023472         | TRIM31     | 30,183,843 | $2.9 \times 10^{-4}$   | 0.726                  |
| rs3734838         | TRIM31     | 30,188,210 | $6.8 \times 10^{-5}$   | 0.143                  |
| rs757262          | TRIM40     | 30,222,934 | 0.50                   | 0.842                  |
| rs757259          | TRIM40     | 30,223,521 | 0.011                  | 0.772                  |
| rs12212092        | TRIM10     | 30,236,421 | $4.4 \times 10^{-8}$   | 0.601                  |
| rs929156          | TRIM15     | 30,247,678 | $4.6 \times 10^{-3}$   | 0.421                  |
| rs2023477         | LOC441140  | 30,337,442 | 0.38                   | 0.729                  |
| rs2516690/rs6986  | RPP21      | 30,421,319 | $2.4 \times 10^{-3}$   | 0.818                  |
| rs978009          | intergenic | 30,490,558 | $2.8 \times 10^{-4}$   | 0.183                  |
| rs2105960         | RANP1      | 30,561,768 | 0.48                   | 0.761                  |
| rs9262138         | DHX16      | 30,735,846 | $6.6 \times 10^{-3}$   | 0.270                  |
| rs3130645         | MDC1       | 30,780,321 | 0.014                  | 0.039                  |
| rs9262152         | MDC1       | 30,788,895 | $1.9 \times 10^{-9}$   | 0.873                  |
| rs2517560         | MDC1       | 30,788,947 | 1                      | 0.014                  |
| rs886424          | C6orf214   | 30,889,981 | $4.3 \times 10^{-8}$   | 0.591                  |
| rs2894046         | C6orf214   | 30,890,084 | $5.8 \times 10^{-4}$   | 0.845                  |
| rs886423          | C6orf214   | 30,890,184 | $2.6 \times 10^{-28}$  | 0.479                  |
| rs2394412         | C6orf214   | 30,890,214 | $1.1 \times 10^{-3}$   | 0.935                  |

|                          |              |            |                         |                       |
|--------------------------|--------------|------------|-------------------------|-----------------------|
| rs9295924                | C6orf214     | 30,890,340 | $2.0 \times 10^{-7}$    | 0.576                 |
| rs1264303                | GTF2H4       | 30,990,492 | $4.3 \times 10^{-3}$    | 0.176                 |
| rs2074506                | GTF2H4       | 30,998,462 | 0.031                   | 0.060                 |
| rs4678                   | GTF2H4       | 31,001,920 | $7.7 \times 10^{-20}$   | 0.212                 |
| rs3131787                | SFTPG        | 31,007,503 | $2.8 \times 10^{-3}$    | 0.633                 |
| rs3131784                | SFTPG        | 31,011,927 | 0.46                    | 0.639                 |
| rs3132580                | DPCR1        | 31,028,103 | $1.6 \times 10^{-30}$   | 0.318                 |
| rs2240804                | DPCR1        | 31,028,869 | 0.36                    | 0.182                 |
| rs2844697                | intergenic   | 31,040,288 | $8.71 \times 10^{-51}$  | 0.094                 |
| rs3095150                | intergenic   | 31,040,511 | $1.5 \times 10^{-22}$   | 0.652                 |
| rs2532924                | intergenic   | 31,040,661 | $7.1 \times 10^{-13}$   | 0.519                 |
| rs3095089                | intergenic   | 31,041,773 | $4.2 \times 10^{-5}$    | 0.370                 |
| rs2254847                | intergenic   | 31,041,827 | $5.5 \times 10^{-11}$   | 0.881                 |
| rs3131933                | intergenic   | 31,041,843 | $1.0 \times 10^{-9}$    | 0.085                 |
| rs1634730                | C6orf205     | 31,062,224 | 0.25                    | 0.968                 |
| rs3094672                | intergenic   | 31,101,356 | $9.9 \times 10^{-30}$   | 0.144                 |
| rs2523898                | intergenic   | 31,101,512 | 0.028                   | 0.041                 |
| rs4713420                | intergenic   | 31,101,546 | $1.1 \times 10^{-18}$   | 0.532                 |
| rs2233974                | C6orf15      | 31,187,995 | $3.7 \times 10^{-37}$   | 0.520                 |
| rs3815087                | PSORS1C1     | 31,201,566 | 0.025                   | 0.237                 |
| rs130067                 | CCHCR1       | 31,226,490 | 0.043                   | 0.237                 |
| rs130076                 | CCHCR1       | 31,230,461 | $6.5 \times 10^{-13}$   | 0.029                 |
| rs9263871                | HCG27        | 31,278,507 | $1.8 \times 10^{-7}$    | 0.528                 |
| <i>HLA-B</i> (two-digit) | <i>HLA-B</i> | 31,429,628 | $3.59 \times 10^{-42}$  | $1.74 \times 10^{-7}$ |
| rs2308655                | <i>HLA-B</i> | 31,430,282 | $7.3 \times 10^{-14}$   | $8.72 \times 10^{-3}$ |
| rs1051488                | <i>HLA-B</i> | 31,430,890 | $3.3 \times 10^{-8}$    | 0.309                 |
| rs3130639                | intergenic   | 31,595,299 | $1.2 \times 10^{-15}$   | 0.161                 |
| rs2516489                | intergenic   | 31,596,017 | $1.1 \times 10^{-5}$    | 0.325                 |
| rs1800750                | TNFA/LTA     | 31,650,942 | $6.3 \times 10^{-16}$   | $1.08 \times 10^{-3}$ |
| rs2736182                | AIF1         | 31,691,291 | 1                       | 0.186                 |
| rs9267522                | BAT2         | 31,711,749 | $3.55 \times 10^{-100}$ | 0.777                 |
| rs3132453                | BAT2         | 31,712,023 | 1                       | 0.363                 |
| rs805295                 | LY6G6D       | 31,783,276 | $8.0 \times 10^{-4}$    | 0.346                 |
| rs2242653                | LY6G6D       | 31,783,744 | 0.018                   | 0.757                 |
| rs3749952                | LY6G6D       | 31,791,136 | 1                       | 0.166                 |
| rs1802127                | MSH5         | 31,837,904 | 1                       | 0.416                 |
| rs707936                 | G7C          | 31,841,629 | $1.9 \times 10^{-5}$    | 0.137                 |
| rs2227956                | HSPA1L       | 31,886,251 | $2.34 \times 10^{-114}$ | 0.518                 |
| rs644827                 | SLC44A4      | 31,946,420 | $1.2 \times 10^{-3}$    | 0.607                 |
| rs2242665                | SLC44A4      | 31,947,288 | $8.4 \times 10^{-4}$    | 0.555                 |
| rs2075798                | SLC44A4      | 31,954,720 | 0.032                   | 0.499                 |
| rs7887                   | EHMT2        | 31,972,526 | 0.91                    | 0.076                 |
| rs9332739                | C2           | 32,011,783 | $2.0 \times 10^{-9}$    | 0.526                 |
| rs4151651                | CFB          | 32,023,593 | $5.3 \times 10^{-3}$    | $5.35 \times 10^{-3}$ |
| rs438999                 | SKIV2L       | 32,036,285 | $1.8 \times 10^{-22}$   | 0.852                 |
| rs437179                 | SKIV2L       | 32,036,993 | 0.14                    | 0.482                 |
| rs2269429                | TNXB/CREBL1  | 32,137,161 | $8.5 \times 10^{-3}$    | 0.226                 |

|                     |             |            |                         |                       |
|---------------------|-------------|------------|-------------------------|-----------------------|
| rs185819            | TNXB/CREBL1 | 32,158,045 | $6.5 \times 10^{-9}$    | 0.317                 |
| rs1150752           | TNXB/CREBL1 | 32,172,704 | $1.08 \times 10^{-72}$  | 0.506                 |
| rs2070600           | AGER        | 32,259,421 | $4.4 \times 10^{-3}$    | 0.207                 |
| rs7775397           | C6orf10     | 32,369,230 | $8.40 \times 10^{-85}$  | 0.381                 |
| rs3749966           | C6orf10     | 32,369,485 | $8.0 \times 10^{-22}$   | 0.067                 |
| rs560505            | C6orf10     | 32,369,749 | $4.8 \times 10^{-27}$   | 0.735                 |
| rs1003878           | C6orf10     | 32,407,800 | $1.1 \times 10^{-36}$   | 0.322                 |
| rs1265754           | C6orf10     | 32,411,670 | $1.26 \times 10^{-60}$  | 0.042                 |
| rs1033500           | C6orf10     | 32,415,360 | $3.7 \times 10^{-27}$   | 0.976                 |
| rs9268368           | C6orf10     | 32,441,933 | $6.2 \times 10^{-22}$   | 0.627                 |
| rs9268384           | C6orf10     | 32,444,564 | $9.3 \times 10^{-27}$   | 0.976                 |
| rs3129941           | C6orf10     | 32,445,664 | $6.10 \times 10^{-192}$ | 0.548                 |
| rs2076530           | BTNL2       | 32,471,794 | $2.8 \times 10^{-20}$   | 0.330                 |
| rs2076523           | BTNL2       | 32,478,813 | $9.94 \times 10^{-43}$  | 0.129                 |
| <i>HLA-DRB1</i>     | HLA-DRB1    | 32,654,524 | $3.99 \times 10^{-300}$ | N/A                   |
| <i>HLA-DQB1</i>     | HLA-DQB1    | 32,735,222 | $< 10^{-300}$           | N/A                   |
| rs1573649           | HLA-DQB2    | 32,839,236 | $2.92 \times 10^{-54}$  | 0.604                 |
| rs2621330           | HLA-DOB     | 32,889,502 | $9.1 \times 10^{-9}$    | 0.051                 |
| rs2070121           | HLA-DOB     | 32,889,532 | $1.7 \times 10^{-7}$    | 0.087                 |
| rs2071554           | HLA-DOB     | 32,892,654 | $3.55 \times 10^{-70}$  | 0.158                 |
| rs241448            | TAP2        | 32,904,663 | $3.0 \times 10^{-26}$   | 0.074                 |
| rs241447            | TAP2        | 32,904,729 | $1.1 \times 10^{-5}$    | 0.215                 |
| rs1800453/rs1135216 | TAP1        | 32,922,953 | 0.11                    | 0.671                 |
| rs4148880/rs1057141 | TAP1        | 32,926,752 | 0.099                   | 0.901                 |
| rs9276814/rs17587   | PSMB9       | 32,933,068 | $4.2 \times 10^{-3}$    | 0.749                 |
| rs1042337           | HLA-DMB     | 33,012,959 | $2.2 \times 10^{-4}$    | 0.033                 |
| rs2071555           | HLA-DMB     | 33,013,064 | 1                       | 0.647                 |
| rs1063478           | HLA-DMA     | 33,025,522 | $1.7 \times 10^{-6}$    | 0.421                 |
| rs2308935/rs1126769 | HLA-DPA1    | 33,144,413 | 0.033                   | 0.053                 |
| rs2281390           | HLA-DPA2    | 33,167,647 | $1.0 \times 10^{-11}$   | $2.50 \times 10^{-3}$ |
| rs3128917           | HLA-DPA2    | 33,167,974 | $4.6 \times 10^{-12}$   | 0.906                 |
| rs2281388           | HLA-DPA2    | 33,168,096 | 1                       | 0.268                 |
| rs7764491           | HLA-DPA2    | 33,168,818 | 0.014                   | 0.323                 |
| rs3117035           | HLA-DPB2    | 33,194,227 | 0.56                    | 0.126                 |
| rs466384/rs14398    | WDR46       | 33,362,643 | 0.93                    | 0.723                 |
| rs3130257           | WDR46       | 33,364,449 | $2.4 \times 10^{-4}$    | 0.916                 |
| rs2071888           | TAPBP       | 33,380,833 | $1.0 \times 10^{-10}$   | 0.018                 |
| rs3130100           | ZBTB22      | 33,391,744 | $4.0 \times 10^{-9}$    | 0.024                 |
| rs3130267           | MYL8P       | 33,414,772 | $4.1 \times 10^{-10}$   | $4.60 \times 10^{-3}$ |
| rs211449            | LYPLA2      | 33,441,894 | $6.4 \times 10^{-3}$    | 0.143                 |
| rs2296336           | ITPR3       | 33,744,638 | 0.91                    | 0.386                 |
| rs2281820           | MLN         | 33,876,875 | 0.88                    | 0.405                 |
| rs1150781           | C6orf1      | 34,322,300 | 0.66                    | 0.983                 |
| rs15922             | TAF11       | 34,958,804 | 0.46                    | 0.150                 |

**Supplementary Table 3a | Assessing the association of the alleles of the test locus using conventional grouping strategies for the confounding effects of the class II loci.**  $P_r$ :  $P$  value for addition of the test locus to class II genotypes grouped according to risk estimates published by Koeleman *et al.*<sup>33</sup> (categorised as high/medium/low/unclassified) in a white ethnic group of European descent.  $P_{34x}$ :  $P$  value for addition of the test locus to *HLA-DRB1* genotypes classified as *HLA-DRB1\*03*, *\*04*, *\*X* where *X* is any non-*HLA-DRB1\*03* or *04* allele but includes *HLA-DRB1\*0403*.  $P_f$ :  $P$  value for addition of the test locus to class II genotypes where genotypes below 0.01 frequency are grouped together.  $P_5$ :  $P$  value for addition of the test locus to class II genotypes where genotypes below 0.05 frequency are grouped together.

| Test locus       | Number of families typed at all three loci | $P_r$                  | $P_{34x}$              | $P_f$                 | $P_5$                  |
|------------------|--------------------------------------------|------------------------|------------------------|-----------------------|------------------------|
| <i>HLA-B</i>     | 736                                        | $3.95 \times 10^{-11}$ | $7.68 \times 10^{-10}$ | $6.20 \times 10^{-7}$ | $2.14 \times 10^{-16}$ |
| rs241448         | 660                                        | $2.95 \times 10^{-9}$  | 0.1101                 | $1.69 \times 10^{-4}$ | $3.15 \times 10^{-6}$  |
| rs241447         | 667                                        | $1.35 \times 10^{-8}$  | 0.2640                 | $3.05 \times 10^{-4}$ | $5.23 \times 10^{-6}$  |
| <i>HLA-DPB1</i>  | 395                                        | $9.14 \times 10^{-7}$  | $5.13 \times 10^{-5}$  | $1.25 \times 10^{-7}$ | $2.51 \times 10^{-7}$  |
| <i>HLA-Bw4/6</i> | 742                                        | $2.13 \times 10^{-6}$  | $1.53 \times 10^{-7}$  | $2.47 \times 10^{-5}$ | $5.14 \times 10^{-6}$  |
| <i>HLA-C</i>     | 649                                        | $3.78 \times 10^{-5}$  | 0.2731                 | 0.1163                | $1.84 \times 10^{-5}$  |
| D6S2444          | 306                                        | $1.22 \times 10^{-4}$  | $2.74 \times 10^{-10}$ | 0.0056                | $6.58 \times 10^{-12}$ |
| rs2071554        | 678                                        | $2.68 \times 10^{-4}$  | $2.07 \times 10^{-8}$  | 0.1150                | $7.69 \times 10^{-10}$ |
| MICB             | 532                                        | $3.60 \times 10^{-4}$  | 0.0123                 | $1.90 \times 10^{-4}$ | $2.31 \times 10^{-5}$  |
| rs1800750        | 697                                        | 0.0029                 | 0.0126                 | 0.0223                | $8.29 \times 10^{-4}$  |
| <i>MICA</i>      | 528                                        | 0.0029                 | 0.0031                 | 0.0358                | $1.25 \times 10^{-4}$  |
| rs2844697        | 711                                        | 0.0029                 | 0.0039                 | 0.5343                | $3.25 \times 10^{-4}$  |
| <i>HLA-A</i>     | 640                                        | 0.0075                 | $1.30 \times 10^{-4}$  | 0.0055                | $4.09 \times 10^{-5}$  |
| D6S258           | 298                                        | 0.0125                 | 0.0027                 | $1.68 \times 10^{-8}$ | $4.79 \times 10^{-8}$  |
| rs4148876        | 652                                        | 0.0329                 | 0.1196                 | 0.9218                | $6.27 \times 10^{-4}$  |
| rs2076523        | 597                                        | 0.1525                 | 0.6133                 | 0.1214                | $1.01 \times 10^{-4}$  |

Comparison of these frequency and risk grouping strategies in our families (Supplementary Results) revealed that the  $P$ -value for the test locus, conditional on the class II genotypes, was, at some loci, dependent on the method of grouping of the class II loci adopted *e.g.* the  $P$ -value for *HLA-B* association varied by nine orders of magnitude between the model grouping genotypes below 0.05 compared to that grouping at 0.01 ( $P = 6.20 \times 10^{-7}$  -  $2.14 \times 10^{-16}$ ). Similarly *D6S2444*, ranged from  $P = 1 \times 10^{-4}$  to  $7 \times 10^{-12}$  for the risk-based and frequency-based methods.

**Supplementary Table 3b | Assessing the effects of different number of terminal leaf nodes of the tree model of the MHC class II loci in the family dataset.** *P* values are given for the association of the test locus with disease, having accounted for *HLA-DRB1* and *HLA-DQB1* genotype associations using a model that partitions them into 22 groups ( $P_{22}$ ) 18 groups ( $P_{18}$ ) 16 groups ( $P_{16}$ ) and 12 groups ( $P_{12}$ ).

| Test locus      | Number of families typed at all 3 loci | $P_{22}$              | $P_{18}$              | $P_{16}$              | $P_{12}$              |
|-----------------|----------------------------------------|-----------------------|-----------------------|-----------------------|-----------------------|
| <i>HLA-B</i>    | 736                                    | $3.32 \times 10^{-7}$ | $4.69 \times 10^{-7}$ | $4.19 \times 10^{-7}$ | $1.15 \times 10^{-6}$ |
| rs241448        | 660                                    | $1.48 \times 10^{-4}$ | $5.12 \times 10^{-5}$ | $5.28 \times 10^{-5}$ | $5.32 \times 10^{-5}$ |
| rs241447        | 667                                    | $5.15 \times 10^{-4}$ | $1.54 \times 10^{-4}$ | $1.45 \times 10^{-4}$ | $1.74 \times 10^{-4}$ |
| <i>HLA-DPB1</i> | 395                                    | $3.41 \times 10^{-5}$ | $2.41 \times 10^{-5}$ | $2.21 \times 10^{-5}$ | $1.25 \times 10^{-5}$ |
| HLA-Bw4/6       | 742                                    | $8.66 \times 10^{-6}$ | $8.08 \times 10^{-6}$ | $6.57 \times 10^{-6}$ | $1.61 \times 10^{-6}$ |
| <i>HLA-C</i>    | 649                                    | 0.4018                | 0.2882                | 0.2858                | 0.5042                |
| D6S2444         | 306                                    | $4.57 \times 10^{-4}$ | 0.00133               | 0.0073                | $3.14 \times 10^{-4}$ |
| rs2071554       | 678                                    | 0.0303                | 0.0166                | 0.0245                | 0.0142                |
| <i>MICB</i>     | 532                                    | 0.0328                | 0.0246                | 0.0276                | 0.0319                |
| rs1800750       | 697                                    | 0.0337                | 0.0382                | 0.0378                | 0.0306                |
| <i>MICA</i>     | 528                                    | 0.1020                | 0.0932                | 0.0810                | $5.28 \times 10^{-4}$ |
| rs2844697       | 711                                    | 0.1821                | 0.2157                | 0.2101                | 0.1383                |
| <i>HLA-A</i>    | 640                                    | 0.0875                | 0.0644                | 0.0675                | 0.0660                |
| D6S258          | 298                                    | 0.0509                | 0.0597                | 0.0611                | 0.0270                |
| rs4148876       | 652                                    | 0.6278                | 0.5548                | 0.5522                | 0.2207                |
| rs2076523       | 597                                    | 0.2832                | 0.4221                | 0.4226                | 0.1870                |

**Supplementary Table 4a | Allele frequencies, odds ratios with 95% confidence intervals for *HLA-A* in the second case-control set of 1,051 cases and 1,125 controls.** Allele *HLA-A\*02* is used as reference as it was the most common. *HLA-A* was associated independently of *HLA-DRB1* and *HLA-DQB1* in the second case-control set,  $P = 1.77 \times 10^{-5}$ .

| <i>HLA-A</i> allele | British cases, n(%) | British controls n(%) | OR [95% CI] without conditioning on <i>HLA-DRB1/HLA-DQB1</i> | OR [95% CI] conditioning on <i>HLA-DRB1/HLA-DQB1</i> |
|---------------------|---------------------|-----------------------|--------------------------------------------------------------|------------------------------------------------------|
| *24                 | 241 (11.48%)        | 185 (8.22%)           | 1.19 [0.93-1.51]                                             | 1.42 [0.96-2.09] <sup>a</sup>                        |
| *30                 | 69 (3.29%)          | 53 (2.36%)            | 1.23 [0.82-1.84]                                             | 1.38 [0.74-2.57]                                     |
| *29                 | 64 (3.05%)          | 76 (3.38%)            | 0.86 [0.59-1.26]                                             | 1.23 [0.68-2.24]                                     |
| *03                 | 269 (12.81%)        | 326 (14.49%)          | 0.78 [0.63-0.97]                                             | 1.13 [0.80-1.58]                                     |
| *25                 | 28 (1.33%)          | 42 (1.87%)            | 0.60 [0.35-1.03]                                             | 1.04 [0.43-2.55]                                     |
| *74                 | 1 (0.05%)           | 1 (0.04%)             | 1.22 [0.06-19.55]                                            | 1.02 [0.01-110.7]                                    |
| *02                 | 651 (31.00%)        | 644 (28.62%)          | 1.00 [reference]                                             | 1.00 [reference]                                     |
| *68                 | 63 (3.00%)          | 61 (2.71%)            | 0.90 [0.61-1.35]                                             | 0.99 [0.50-1.95]                                     |
| *31                 | 46 (2.19%)          | 56 (2.49%)            | 0.82 [0.52-1.27]                                             | 0.94 [0.47-1.91]                                     |
| *26                 | 27 (1.29%)          | 55 (2.44%)            | 0.40 [0.24-0.67]                                             | 0.86 [0.40-1.85]                                     |
| *66                 | 3 (0.14%)           | 7 (0.31%)             | 0.29 [0.07-1.23]                                             | 0.80 [0.15-4.41]                                     |
| *23                 | 18 (0.86%)          | 42 (1.87%)            | 0.47 [0.26-0.85]                                             | 0.71 [0.29-1.74]                                     |
| *01                 | 468 (22.29%)        | 454 (20.18%)          | 1.01 [0.84-1.21]                                             | 0.56 [0.42-0.75]                                     |
| *11                 | 93 (4.43%)          | 147 (6.53%)           | 0.61 [0.45-0.83]                                             | 0.52 [0.32-0.84]                                     |
| *32                 | 46 (2.19%)          | 85 (3.78%)            | 0.52 [0.35-0.78]                                             | 0.37 [0.21-0.67]                                     |
| *33                 | 13 (0.62%)          | 14 (0.62%)            | 0.74 [0.33-1.65]                                             | 0.24 [0.08-0.74]                                     |

(a) Note that although *HLA-A\*24* is not significantly different to *HLA-A\*02*, it is more strongly associated with T1D than *HLA-A\*01*, \*11, \*32 and \*33.

**Supplementary Table 4b | T1D association of the *HLA-A* alleles conditioned on the MHC class II genes and *HLA-B* in the families and the first case-control set.**

| <i>HLA-A</i><br>allele | Allele frequency, n (%) |              | Families, RR [95% CI]                               | Case-control set, OR [95% CI]                       |                                                                    |
|------------------------|-------------------------|--------------|-----------------------------------------------------|-----------------------------------------------------|--------------------------------------------------------------------|
|                        | Cases                   | Controls     | Conditioning on <i>HLA-DQB1</i> and <i>HLA-DRB1</i> | Conditioning on <i>HLA-DQB1</i> and <i>HLA-DRB1</i> | Conditioning on <i>HLA-DQB1</i> , <i>HLA-DRB1</i> and <i>HLA-B</i> |
| *24                    | 331 (10.9)              | 265 (7.5)    | 1.20[0.89-1.61]                                     | 1.66[1.22-2.24]                                     | 1.54[1.11-2.16]                                                    |
| *03                    | 380 (12.6)              | 493 (14.0)   | 0.84[0.65-1.10]                                     | 1.16[0.88-1.52]                                     | 1.17[0.87-1.58]                                                    |
| *02                    | 1,021 (33.7)            | 1,034 (29.4) | 1.00 [reference]                                    | 1.00 [reference]                                    | 1.00 [reference]                                                   |
| *30                    | 102 (3.4)               | 82 (2.3)     | 1.03[0.62-1.71]                                     | 1.28[0.78-2.10]                                     | 0.89[0.50-1.57]                                                    |
| *29                    | 93 (3.1)                | 161 (4.6)    | 0.79[0.52-1.19]                                     | 0.83[0.54-1.28]                                     | 0.85[0.53-1.35]                                                    |
| *68                    | 78 (2.6)                | 136 (3.9)    | 0.81[0.52-1.27]                                     | 0.82[0.52-1.30]                                     | 0.84[0.52-1.36]                                                    |
| *32                    | 80 (2.6)                | 130 (3.7)    | 0.50[0.30-0.84]                                     | 0.64[0.40-1.01]                                     | 0.64[0.39-1.04]                                                    |
| *33                    | 23 (0.76)               | 30 (0.85)    | 0.93[0.40-2.13]                                     | 0.58[0.25-1.39]                                     | 0.63[0.25-1.60]                                                    |
| *26                    | 38 (1.3)                | 85 (2.4)     | 0.86[0.50-1.50]                                     | 0.49[0.27-0.88]                                     | 0.63[0.34-1.16]                                                    |
| *25                    | 39 (1.3)                | 64 (1.8)     | 0.55[0.31-0.95]                                     | 0.87[0.46-1.67]                                     | 0.62[0.31-1.23]                                                    |
| *01                    | 648 (21.4)              | 638 (18.1)   | 0.86[0.69-1.07]                                     | 0.67[0.53-0.84]                                     | 0.58[0.43-0.79]                                                    |
| *23                    | 24 (0.8)                | 46 (1.3)     | 0.77[0.40-1.50]                                     | 0.57[0.26-1.26]                                     | 0.51[0.22-1.17]                                                    |
| *11                    | 99 (3.3)                | 229 (6.5)    | 0.77[0.52-1.15]                                     | 0.44[0.29-0.66]                                     | 0.47[0.30-0.73]                                                    |
| *31                    | 62 (2.1)                | 106 (3.0)    | 0.76[0.49-1.20]                                     | 0.36[0.22-0.59]                                     | 0.41[0.24-0.69]                                                    |

Relative risks, RR; odds ratios, OR; confidence interval, CI

Alleles are ordered by risk in the case-control set (once *HLA-DQB1*, *HLA-DRB1* and *HLA-B* have been accounted for). The most common allele, *HLA-A*\*02, gives the tightest 95% CIs so is used as reference. Results are given for the families (736) and the first case-control set (1,451 T1D patients and 1,628 controls) that were successfully typed at all four classical loci). Allele frequencies in the families are shown in Supplementary Table 1.

Supplementary Table 5a | Association of the *HLA-B* alleles with T1D. HLA-B\*08 is used as reference.

| <i>HLA-B</i><br>allele | Allele frequency, n (%) |            | Families, RR [95% CI]                               | Case-control set, OR [95% CI]                       |                                                                    |
|------------------------|-------------------------|------------|-----------------------------------------------------|-----------------------------------------------------|--------------------------------------------------------------------|
|                        | Cases                   | Controls   | Conditioning on <i>HLA-DQB1</i> and <i>HLA-DRB1</i> | Conditioning on <i>HLA-DQB1</i> and <i>HLA-DRB1</i> | Conditioning on <i>HLA-DQB1</i> , <i>HLA-DRB1</i> and <i>HLA-A</i> |
| *49                    | 38 (1.3)                | 34 (1.0)   | 1.07[0.58-1.98]                                     | 3.23 [1.39-7.53]                                    | 2.40 [0.97-5.94]                                                   |
| *50                    | 42 (1.4)                | 35 (1.1)   | 1.73[0.83-3.59]                                     | 2.31 [1.10-4.85]                                    | 1.66 [0.76-3.60]                                                   |
| *39                    | 143 (4.7)               | 79 (2.4)   | 2.82[1.80-4.41]                                     | 2.53 [1.57-4.07]                                    | 1.55 [0.92-2.62]                                                   |
| *18                    | 202 (6.7)               | 128 (3.8)  | 1.41[1.00-1.98]                                     | 1.92 [1.27-2.90]                                    | 1.57 [0.96-2.58]                                                   |
| *13                    | 43 (1.4)                | 56 (1.7)   | 0.93[0.69-1.20]                                     | 2.03 [1.03-4.03]                                    | 1.51 [0.72-3.20]                                                   |
| *41                    | 11 (0.36)               | 23 (0.69)  | 0.49[0.22-1.07]                                     | 1.52 [0.49-4.72]                                    | 1.02 [0.27-3.82]                                                   |
| *08                    | 788 (26.1)              | 461 (13.8) | 1.00[reference]                                     | 1.00 [reference]                                    | 1.00 [reference]                                                   |
| *55                    | 37 (1.2)                | 71 (2.1)   | 0.58[0.32-1.06]                                     | 1.35 [0.68-2.67]                                    | 0.96 [0.46-2.01]                                                   |
| *07                    | 249 (8.2)               | 465 (13.9) | 0.91[0.69-1.20]                                     | 1.32 [0.94-1.84]                                    | 0.89 [0.60-1.33]                                                   |
| *44                    | 344 (11.4)              | 567 (17.0) | 0.79[0.60-1.04]                                     | 1.05 [0.79-1.39]                                    | 0.81 [0.57-1.15]                                                   |
| *51                    | 78 (2.6)                | 109 (3.3)  | 0.76[0.49-1.20]                                     | 0.98 [0.57-1.68]                                    | 0.75 [0.41-1.36]                                                   |
| *53                    | 3 (0.10)                | 9 (0.27)   | 0.38[0.06-2.58]                                     | 1.26 [0.17-9.14]                                    | 0.72 [0.09-5.75]                                                   |
| *15                    | 388 (12.8)              | 267 (8.0)  | 0.98[0.75-1.30]                                     | 1.03 [0.76-1.39]                                    | 0.70 [0.49-1.01]                                                   |
| *35                    | 130 (4.3)               | 197 (5.9)  | 0.79[0.56-1.12]                                     | 0.86 [0.58-1.28]                                    | 0.69 [0.44-1.08]                                                   |
| *40                    | 257 (8.5)               | 232 (6.9)  | 0.93[0.70-1.24]                                     | 0.91 [0.66-1.25]                                    | 0.68 [0.46-1.01]                                                   |
| *52                    | 3 (0.10)                | 20 (0.60)  | 0.14[0.01-1.61]                                     | 0.73 [0.11-4.95]                                    | 0.68 [0.09-5.10]                                                   |
| *45                    | 9 (0.30)                | 26 (0.78)  | 1.92[0.66-5.59]                                     | 0.68 [0.24-1.97]                                    | 0.59 [0.19-1.83]                                                   |
| *37                    | 21 (0.69)               | 51 (1.5)   | 0.82[0.36-1.88]                                     | 0.70 [0.30-1.64]                                    | 0.57 [0.23-1.43]                                                   |
| *14                    | 54 (1.8)                | 159 (4.8)  | 0.92[0.61-1.41]                                     | 0.70 [0.42-1.16]                                    | 0.54 [0.30-0.96]                                                   |
| *47                    | 9 (0.30)                | 8 (0.24)   | 0.86[0.46-1.61]                                     | 0.87 [0.16-4.70]                                    | 0.54 [0.09-3.08]                                                   |
| *56                    | 14 (0.46)               | 16 (0.48)  | 1.14[0.28-4.60]                                     | 0.70 [0.23-2.08]                                    | 0.47 [0.15-1.53]                                                   |
| *58                    | 11 (0.36)               | 19 (0.57)  | 1.36[0.48-3.83]                                     | 0.55 [0.19-1.57]                                    | 0.46 [0.15-1.43]                                                   |
| *57                    | 26 (0.86)               | 143 (4.3)  | 0.60[0.30-1.20]                                     | 0.53 [0.27-1.04]                                    | 0.42 [0.21-0.86]                                                   |
| *27                    | 113 (3.7)               | 145 (4.3)  | 0.81[0.56-1.17]                                     | 0.55 [0.36-0.82]                                    | 0.41 [0.26-0.66]                                                   |
| *38                    | 10 (0.33)               | 26 (0.78)  | 0.33[0.14-0.77]                                     | 0.51 [0.14-1.77]                                    | 0.36 [0.10-1.39]                                                   |



**Supplementary Table 5b | Mean age of T1D patients at diagnosis (years).** Both HLA-B\*39 ( $P = 0.0021$  for 1,497 British cases and  $P = 0.0022$  for one affected offspring selected at random from each of 733 families) and HLA-A\*24 ( $P = 0.01$  for 1,927 British cases and  $P = 0.0016$  for one affected offspring selected at random from 637 families) were found to be associated with a younger age-at-diagnosis of T1D.

| <i>HLA-B</i> or <i>HLA-A</i> genotype | Families, one affected child per family | Case-control set, patients |
|---------------------------------------|-----------------------------------------|----------------------------|
| HLA-B*39/39                           | 2.4                                     | 6.0                        |
| HLA-B*39/X                            | 8.2                                     | 6.4                        |
| HLA-B*X/X                             | 10.9                                    | 7.4                        |
| HLA-A*24/24                           | 4.9                                     | 6.9                        |
| HLA-A*24/Y                            | 9.6                                     | 6.6                        |
| HLA-A*Y/Y                             | 11.5                                    | 7.5                        |

X – any *HLA-B* allele other than HLA-B\*39; Y – any *HLA-A* allele other than HLA A\*24

**Supplementary Table 5c | Frequency distribution and ORs of HLA-B\*39 and HLA-A\*24, by age-at-diagnosis of T1D, from up to 1,927 cases and up to 733 families, using just one affected offspring chosen at random.** Age is categorised into centiles (25th/50th/75th/100th), which corresponds to 0-4 yr / 4-7 yr / 7-10 yr / 10+ yr in the isolated cases and 0-5 yr / 5-10 yr / 10-14 yr / 14+ yr in the affected offspring. Note that the distributions have not been corrected for class II effects.

| All British Cases * |                             |                             | Families **         |                             |                             |
|---------------------|-----------------------------|-----------------------------|---------------------|-----------------------------|-----------------------------|
| Centile year groups | Frequency of HLA-B*39, n(%) | Frequency of HLA-A*24, n(%) | Centile year groups | Frequency of HLA-B*39, n(%) | Frequency of HLA-A*24, n(%) |
| 0-4 yrs             | 57 (6.5%)                   | 105 (11.9%)                 | 0-5 yrs             | 25 (6.7%)                   | 47 (13.8%)                  |
| 4-7 yrs             | 47 (4.0%)                   | 100 (13.6%)                 | 5-10 yrs            | 19 (4.4%)                   | 44 (14.3%)                  |
| 7-10 yrs            | 37 (4.1%)                   | 63 (9.57%)                  | 10-14 yrs           | 10 (3.0%)                   | 26 (8.3%)                   |
| 10+ yrs             | 2 (2.4%)                    | 63 (8.36%)                  | 14+ yrs             | 8 (2.3%)                    | 27 (8.5%)                   |

**Supplementary Table 5d | Association of the HLA-B\*39 allele subtypes in T1D.**

| <i>HLA-B</i><br>allele | Allele Frequency n(%) |             | Families, RR<br>(95% CI)                                  | Case-control set, OR (95% CI)                             |                                                                             |  |
|------------------------|-----------------------|-------------|-----------------------------------------------------------|-----------------------------------------------------------|-----------------------------------------------------------------------------|--|
|                        | Cases                 | Controls    | Conditioning on<br><i>HLA-DQB1</i> and<br><i>HLA-DRB1</i> | Conditioning on<br><i>HLA-DQB1</i> and<br><i>HLA-DRB1</i> | Conditioning on<br><i>HLA-DQB1</i> ,<br><i>HLA-DRB1</i> and<br><i>HLA-A</i> |  |
| *44                    | 344 (11.38)           | 567 (16.95) | 1.00 [reference]                                          | 1.00 [reference]                                          | 1.00 [reference]                                                            |  |
| *3901                  | 43 (1.44)             | 34 (1.04)   | 2.34 [0.86-6.37]                                          | 1.95 [0.94-4.07]                                          | 2.06 [0.97-4.37]                                                            |  |
| *3906                  | 87 (2.90)             | 40 (1.22)   | 5.62 [2.13-14.84]                                         | 2.71 [1.47-4.99]                                          | 1.83 [0.97-3.45]                                                            |  |

We tested the four-digit subtypes of HLA-B\*39 as they are split into approximately equally frequent subtypes (Supplementary Table 1). The two most common subtypes of HLA-B39 are given. Although allele HLA-B\*3906 conferred somewhat higher RR than HLA-B\*3901 in the families, their 95% CIs overlapped, indicating the need for even larger datasets in future analyses. However, it is likely that both subtypes of HLA-B\*39 contribute to HLA-B\*39 susceptibility.

**Supplementary Table 6a | The top 20 most associated SNPs from the WTCCC scan without conditioning on the MHC class II loci.** As expected, all 20 SNPs were located in the MHC class II region.

| Locus     | Position | <i>P</i> value          |
|-----------|----------|-------------------------|
| rs9273363 | 32734250 | 4.29x10 <sup>-298</sup> |
| rs9270986 | 32682038 | 1.22x10 <sup>-151</sup> |
| rs3135377 | 32493377 | 2.52x10 <sup>-144</sup> |
| rs9272346 | 32712350 | 3.06x10 <sup>-138</sup> |
| rs9272723 | 32717405 | 1.79x10 <sup>-133</sup> |
| rs3916765 | 32793528 | 2.84x10 <sup>-131</sup> |
| rs9275523 | 32782972 | 9.30x10 <sup>-131</sup> |
| rs9275418 | 32778222 | 1.69x10 <sup>-127</sup> |
| rs3132959 | 32406920 | 7.36x10 <sup>-125</sup> |
| rs3129932 | 32444105 | 1.10x10 <sup>-124</sup> |
| rs910049  | 32423705 | 2.22x10 <sup>-121</sup> |
| rs3129768 | 32703061 | 7.28x10 <sup>-110</sup> |
| rs3129934 | 32444165 | 9.21x10 <sup>-110</sup> |
| rs3129900 | 32413957 | 5.34x10 <sup>-109</sup> |
| rs9469220 | 32766288 | 2.79x10 <sup>-101</sup> |
| rs3131294 | 32288124 | 6.05x10 <sup>-90</sup>  |
| rs9268230 | 32395545 | 1.09x10 <sup>-89</sup>  |
| rs9275134 | 32758590 | 9.49x10 <sup>-86</sup>  |
| rs2856688 | 32762618 | 1.70x10 <sup>-85</sup>  |
| rs6936863 | 32792007 | 2.00x10 <sup>-83</sup>  |

**Supplementary Table 6b | Association analysis of the eight most associated SNPs from the WTCCC scan after conditioning on the MHC class II loci in both the original study (1,281 cases and 860 controls) and the follow-up study of 2,484 cases and 2,019 controls.**

| * SNP      | HLA Class region | Physical position / bp | Unconditioned <i>P</i> in original case-control set | <i>P</i> conditioned on <i>HLA-DRB1</i> and <i>HLA-DQB1</i> in 1,281 cases, 860 controls | <i>P</i> conditioned on <i>HLA-DRB1</i> and <i>HLA-DQB1</i> 2,484 cases, 2,019 controls | <i>P</i> conditioned on <i>HLA-DRB1</i> , <i>HLA-DQB1</i> , <i>HLA-B</i> in 2,484 cases, 2,019 controls |
|------------|------------------|------------------------|-----------------------------------------------------|------------------------------------------------------------------------------------------|-----------------------------------------------------------------------------------------|---------------------------------------------------------------------------------------------------------|
| rs3130531  | I                | 31314595               | 0.0056                                              | $6.74 \times 10^{-7}$                                                                    | $5.08 \times 10^{-7}$                                                                   | 0.1590                                                                                                  |
| †rs7770592 | I                | 29503726               | 0.1328                                              | $3.82 \times 10^{-6}$                                                                    | $1.38 \times 10^{-4}$                                                                   | $2.24 \times 10^{-4}$                                                                                   |
| rs2240063  | I                | 31222724               | 0.0029                                              | $1.50 \times 10^{-5}$                                                                    | $4.28 \times 10^{-4}$                                                                   | 0.7885                                                                                                  |
| rs9268541  | II               | 32492505               | $7.96 \times 10^{-10}$                              | $2.16 \times 10^{-5}$                                                                    | $4.18 \times 10^{-5}$                                                                   | 0.0029                                                                                                  |
| rs9263702  | I                | 31202174               | $8.66 \times 10^{-10}$                              | $2.47 \times 10^{-5}$                                                                    | $1.61 \times 10^{-5}$                                                                   | 0.2351                                                                                                  |
| †rs1233367 | I                | 29730199               | 0.6062                                              | $5.44 \times 10^{-5}$                                                                    | $3.73 \times 10^{-4}$                                                                   | 0.0011                                                                                                  |
| †rs9268831 | II               | 32535726               | $2.81 \times 10^{-26}$                              | $9.68 \times 10^{-5}$                                                                    | $6.95 \times 10^{-8}$                                                                   | $5.44 \times 10^{-6}$                                                                                   |

\* rs9272346 failed assay design

† These loci were also tested for association independent to *HLA-DRB1*, *HLA-DQB1* and *HLA-A*. rs9268831 was found to have an independent T1D association ( $P = 4.39 \times 10^{-6}$ ) whereas rs1233367 and rs7770592 did not ( $P = 0.1021$  and  $0.0106$  respectively).

**Supplementary Table 6c | Association of HLA-B alleles in the follow-up to the WTCCC study comprising up to 2,484 cases and 2,019 controls. *HLA-B* was associated with T1D after *HLA-DRB1* and *HLA-DQB1* were accounted for in the model,  $P = 3.80 \times 10^{-17}$ .**

| <i>HLA-B</i><br>allele | Allele frequency, n (%) |             | Case-control set, OR [95% CI]                             |                                                                          |
|------------------------|-------------------------|-------------|-----------------------------------------------------------|--------------------------------------------------------------------------|
|                        | Cases                   | Controls    | Conditioning on<br><i>HLA-DQB1</i> and<br><i>HLA-DRB1</i> | Conditioning on <i>HLA-DQB1</i> ,<br><i>HLA-DRB1</i> and<br><i>HLA-A</i> |
| *49                    | 61 (1.22)               | 65 (1.16)   | 1.56 [0.84-2.89]                                          | 1.93 [0.98-3.77]                                                         |
| *50                    | 63 (1.26)               | 54 (0.96)   | 1.88 [1.05-3.36]                                          | 2.01 [1.09-3.70]                                                         |
| *18                    | 341 (6.84)              | 197 (3.52)  | 1.92 [1.39-2.67]                                          | 2.07 [1.43-3.00]                                                         |
| *39                    | 229 (4.60)              | 113 (2.02)  | 2.84 [1.96-4.14]                                          | 2.57 [1.71-3.85]                                                         |
| *13                    | 78 (1.57)               | 95 (1.70)   | 1.88 [1.16-3.07]                                          | 2.19 [1.28-3.74]                                                         |
| *41                    | 21 (0.42)               | 33 (0.59)   | 1.39 [0.61-3.17]                                          | 1.08 [0.43-2.67]                                                         |
| *08                    | 1314 (26.37)            | 776 (13.87) | 0.94 [0.76-1.16]                                          | 1.20 [0.92-1.58]                                                         |
| *55                    | 60 (1.20)               | 113 (2.02)  | 1.07 [0.63-1.82]                                          | 1.02 [0.58-1.79]                                                         |
| *07                    | 391 (7.85)              | 837 (14.96) | 0.93 [0.72-1.19]                                          | 0.81 [0.61-1.07]                                                         |
| *44                    | 603 (12.10)             | 971 (17.36) | 1.00 [reference]                                          | 1.00 [reference]                                                         |
| *51                    | 128 (2.57)              | 188 (3.36)  | 0.97 [0.65-1.44]                                          | 0.98 [0.64-1.49]                                                         |
| *15                    | 610 (12.24)             | 421 (7.52)  | 0.96 [0.74-1.22]                                          | 0.87 [0.67-1.14]                                                         |
| *35                    | 219 (4.40)              | 351 (6.23)  | 0.77 [0.57-1.03]                                          | 0.77 [0.55-1.06]                                                         |
| *40                    | 403 (8.09)              | 373 (6.67)  | 0.96 [0.74-1.25]                                          | 0.96 [0.72-1.28]                                                         |
| *45                    | 15 (0.30)               | 41 (0.73)   | 0.47 [0.19-1.15]                                          | 0.49 [0.20-1.23]                                                         |
| *37                    | 32 (0.64)               | 91 (1.63)   | 0.55 [0.29-1.05]                                          | 0.64 [0.31-1.30]                                                         |
| *14                    | 83 (1.67)               | 247 (4.41)  | 0.59 [0.40-0.88]                                          | 0.65 [0.42-0.99]                                                         |
| *57                    | 44 (0.88)               | 229 (4.09)  | 0.40 [0.24-0.67]                                          | 0.44 [0.25-0.75]                                                         |
| *27                    | 185 (3.71)              | 237 (4.24)  | 0.62 [0.45-0.87]                                          | 0.61 [0.43-0.87]                                                         |
| *38                    | 24 (0.48)               | 49 (0.88)   | 1.15 [0.50-2.63]                                          | 0.86 [0.34-2.17]                                                         |

**Supplementary Table 6d | Association of *HLA-A* alleles in the follow-up to the WTCCC study comprising up to 2,484 cases and 2,019 controls. *HLA-A* was associated with T1D after *HLA-DRB1* and *HLA-DQB1* were accounted for in the model,  $P = 4.59 \times 10^{-15}$ .**

| <i>HLA-A</i><br>allele | Allele frequency, n (%) |              | Case-control set, OR [95% CI]                       |                                                                    |
|------------------------|-------------------------|--------------|-----------------------------------------------------|--------------------------------------------------------------------|
|                        | Cases                   | Controls     | Conditioning on <i>HLA-DQB1</i> and <i>HLA-DRB1</i> | Conditioning on <i>HLA-DQB1</i> , <i>HLA-DRB1</i> and <i>HLA-B</i> |
| *24                    | 599 (11.15)             | 458 (7.83)   | 1.54 [1.23-1.93]                                    | 1.44 [1.12-1.86]                                                   |
| *03                    | 673 (12.53)             | 828 (14.16)  | 1.11 [0.91-1.36]                                    | 1.22 [0.97-1.52]                                                   |
| *02                    | 1752 (32.61)            | 1702 (29.11) | 1.00 [reference]                                    | 1.00 [reference]                                                   |
| *30                    | 173 (3.22)              | 137 (2.34)   | 1.32 [0.92-1.90]                                    | 0.80 [0.51-1.23]                                                   |
| *29                    | 168 (3.13)              | 244 (4.17)   | 0.93 [0.67-1.28]                                    | 1.00 [0.70-1.44]                                                   |
| *68                    | 149 (2.77)              | 203 (3.47)   | 0.86 [0.61-1.23]                                    | 0.91 [0.62-1.33]                                                   |
| *32                    | 127 (2.36)              | 218 (3.73)   | 0.56 [0.40-0.79]                                    | 0.63 [0.44-0.92]                                                   |
| *33                    | 37 (0.69)               | 45 (0.77)    | 0.47 [0.24-0.90]                                    | 0.59 [0.29-1.23]                                                   |
| *26                    | 70 (1.30)               | 141 (2.41)   | 0.67 [0.43-1.06]                                    | 0.79 [0.49-1.29]                                                   |
| *25                    | 70 (1.30)               | 106 (1.81)   | 0.98 [0.59-1.61]                                    | 0.67 [0.39-1.16]                                                   |
| *01                    | 1180 (21.97)            | 1104 (18.88) | 0.68 [0.57-0.80]                                    | 0.62 [0.49-0.78]                                                   |
| *23                    | 44 (0.82)               | 89 (1.52)    | 0.70 [0.39-1.24]                                    | 0.72 [0.38-1.35]                                                   |
| *11                    | 201 (3.74)              | 378 (6.47)   | 0.53 [0.40-0.71]                                    | 0.60 [0.43-0.82]                                                   |
| *31                    | 114 (2.12)              | 164 (2.81)   | 0.49 [0.33-0.71]                                    | 0.52 [0.34-0.80]                                                   |

**Supplementary Table 7 | Relative risks and odds ratios for the different groups in the tree models used for the families and the first case-control set.** In both cases a reasonably common and neutral group is used as reference. Groups marked in bold are relatively neutral.

| Group | Families<br>RR [95% CI] | Case-control set<br>OR [95% CI] |
|-------|-------------------------|---------------------------------|
| 1     | 8.13 [3.24-20.42]       |                                 |
| 2     | 6.01 [1.99-18.12]       | 6.15 [4.26-8.90]                |
| 3     | 4.99 [3.53-7.07]        |                                 |
| 4     | 4.04 [1.39-11.71]       |                                 |
| 5     | 3.61 [2.44-5.34]        |                                 |
| 6     | 1.91 [0.69-5.28]        |                                 |
| 7     | 1.86 [1.30-2.64]        | 1.74 [1.15-2.62]                |
| 8     | 1.25 [0.80-1.94]        | 1.11 [0.53-2.32]                |
| 9     | <b>1.00 [reference]</b> | <b>1.00 [reference]</b>         |
| 10    | 0.55 [0.37-0.81]        | 0.52 [0.24-1.15]                |
| 11    | 0.53 [0.33-0.86]        | 0.35 [0.22-0.55]                |
| 12    | 0.45 [0.06-3.58]        | 0.23 [0.14-0.39]                |
| 13    | 0.27 [0.17-0.43]        | 0.21 [0.11-0.41]                |
| 14    | 0.09 [0.04-0.18]        | 0.07 [0.01-0.63]                |
| 15    | 0.03 [0.02-0.06]        | 0.09 [0.05-0.15]                |
| 16    |                         | 0.03 [0.02-0.04]                |

**Supplementary Figure 1a | Bootstrap analysis of  $\beta$  against group size. 1,000 bootstrap samples were generated and the association of *HLA-DRA* SNP, rs9268831, assessed (Methods). We show the plot of the bootstrap logit coefficient,  $\beta$  against the number of terminal groups in the model of the class II effects with lowess smoother<sup>21</sup>. A general trend of a reduction in effect size (increase in  $\beta$ ) with increasing group size is observed. However this increase is small, hence there is only a small dependence of  $\beta$  on group number.  $b = \beta$ ,  $gps = groups$**

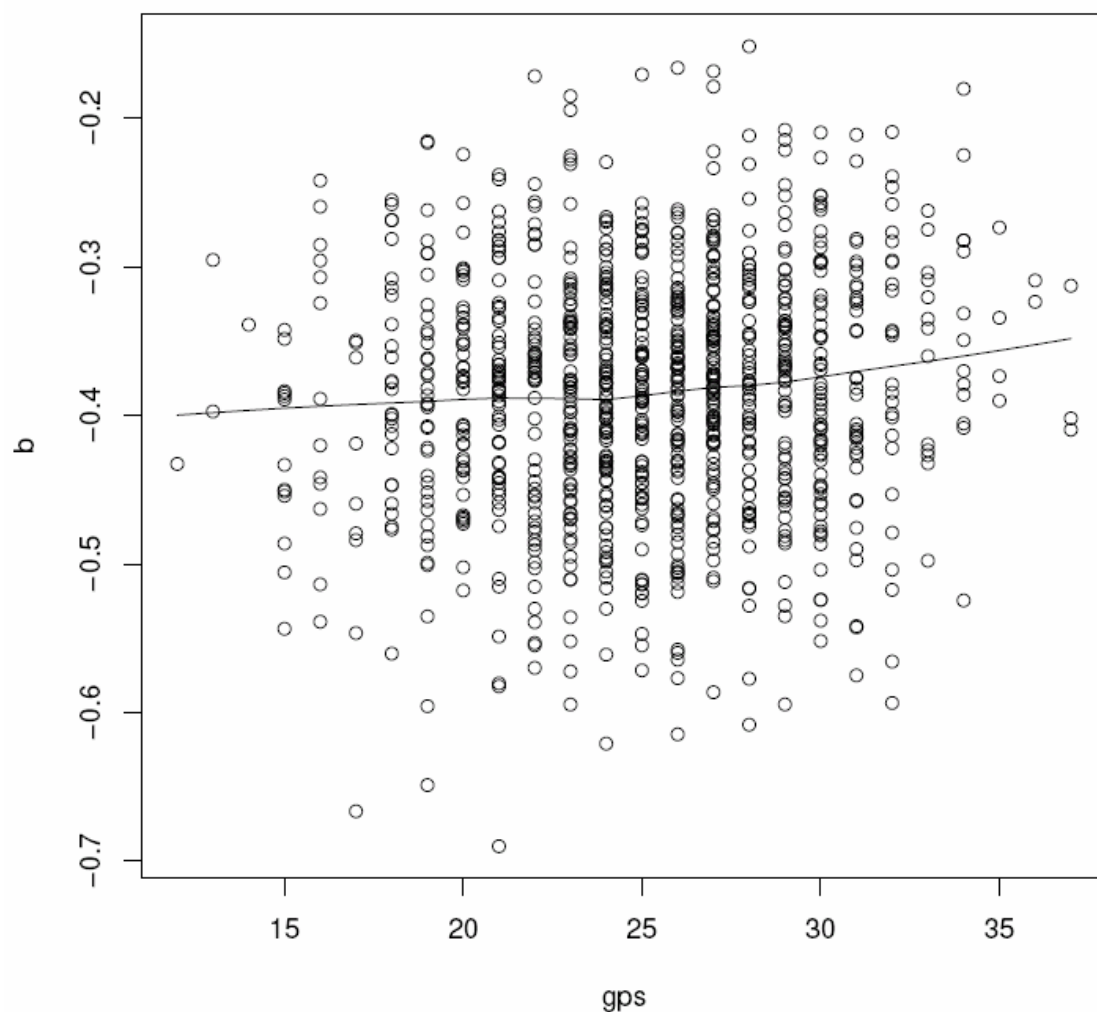



**Supplementary Figure 1b | Bootstrap analysis of  $\text{var}(\beta)$  against group size (Methods).** We show the plot of the bootstrap  $\text{var}(\beta)$  from the *HLA-DRA* SNP, rs9268831, bootstrap samples, against the number of terminal groups in the model of the class II effects with lowess smoother<sup>21</sup>. Note the variance increases with increasing numbers of groups.  $v = \text{var}(\beta)$ ,  $\text{gps} = \text{groups}$

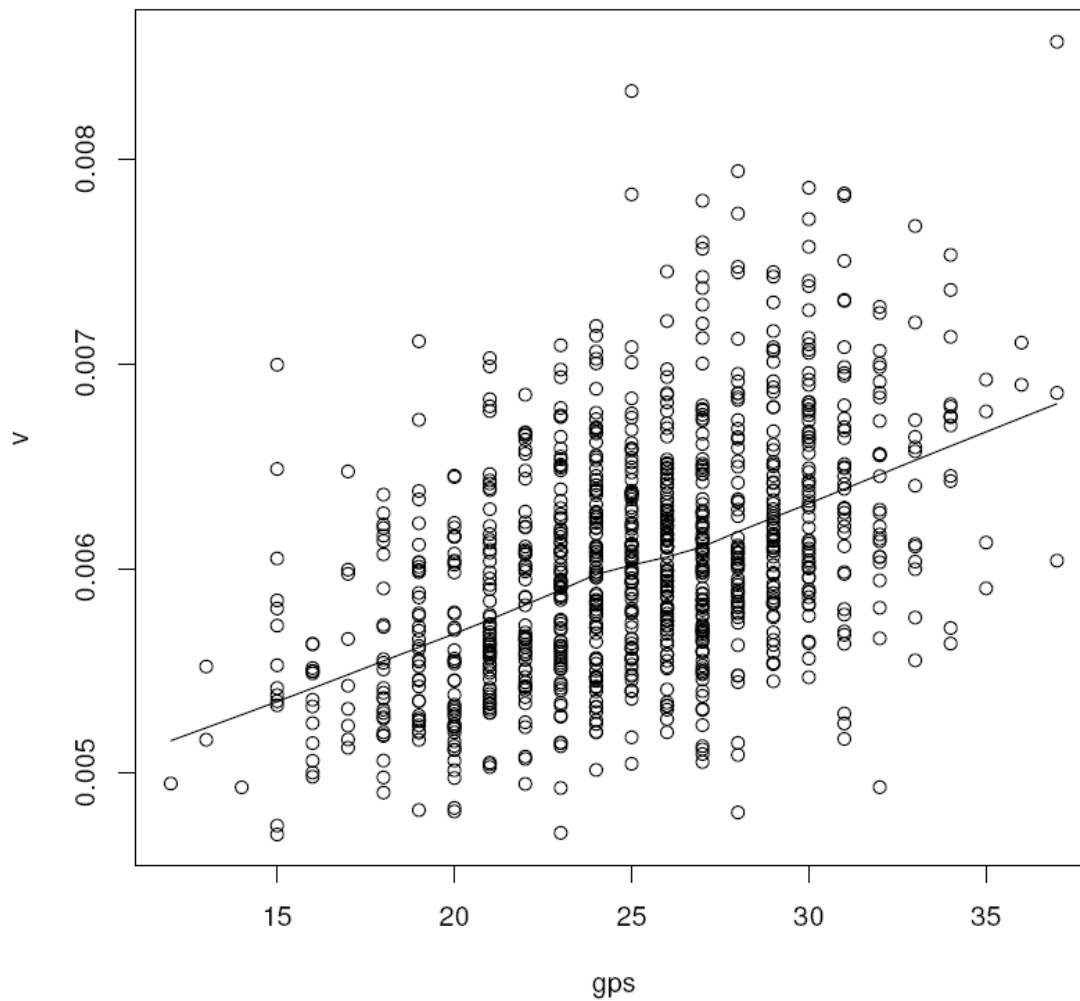

## References

31. Howson, J. M. M., Barratt, B. J., Todd, J. A. & Cordell, H. J. Comparison of population- and family-based methods for genetic association analysis in the presence of interacting loci. *Genet Epidemiol* **29**, 51-67 (2005).
32. Li, M., Boehnke, M. & Abecasis, G. R. Efficient study designs for test of genetic association using sibship data and unrelated cases and controls. *Am J Hum Genet* **78**, 778-92 (2006).
33. Koeleman, B. P. et al. Genotype effects and epistasis in type 1 diabetes and HLA-DQ trans dimer associations with disease. *Genes Immun* **5**, 381-8 (2004).
34. Smyth, D. J. et al. A genome-wide association study of nonsynonymous SNPs identifies a type 1 diabetes locus in the interferon-induced helicase (*IFIH1*) region. *Nat Genet* **38**, 617-619 (2006).
